# Supplementary material for: The HTAP_v3.1 emission mosaic: merging regional and global monthly emissions (2000–2020) to support air quality modelling and policies
Source: Copernicus journal article supplement (doi:10.5194/essd-2024-601), 2025-02-07
Supplement: Supplementary file 2 [file essd-2024-601-supplement.zip]

## Supplementary material for paper

### The HTAP\_v3.1 emission mosaic: merging regional and global monthly emissions (2000-2020) to support air quality modelling and policies

Monica Crippa<sup>1</sup>, Diego Guizzardi<sup>1</sup>, Tim Butler<sup>2</sup>, Terry Keating<sup>3</sup>, Rosa Wu<sup>16</sup>, Jacek Kaminski<sup>4</sup>, Jeroen Kuenen<sup>5</sup>, Junichi Kurokawa<sup>6</sup>, Satoru Chatani<sup>15</sup>, Tazuko Morikawa<sup>7</sup>, George Pouliot<sup>17</sup>, Jacinthe Racine<sup>8</sup>, Michael D. Moran<sup>16</sup>, Zbigniew Klimont<sup>9</sup>, Patrick M. Manseau<sup>8</sup>, Rabab Mashayekhi<sup>8</sup>, Barron H. Henderson<sup>17</sup>, Steven J. Smith<sup>10</sup>, Rachel Hoesly<sup>10</sup>, Marilena Muntean<sup>1</sup>, Manjola Banja<sup>11</sup>, Edwin Schaaf<sup>1</sup>, Federico Pagani<sup>11</sup>, Jung-Hun Woo<sup>13,14</sup>, Jinseok Kim<sup>14</sup>, Enrico Pisoni<sup>1</sup>, Junhua Zhang<sup>16</sup>, David Niemi<sup>8</sup>, Mourad Sassi<sup>8</sup>, Annie Duhamel<sup>8</sup>, Tabish Ansari<sup>2</sup>, Kristen Foley<sup>17</sup>, Guannan Geng<sup>12</sup>, Yifei Chen<sup>18</sup>, Qiang Zhang<sup>18</sup>

<sup>1</sup>European Commission, Joint Research Centre (JRC), Ispra, Italy

<sup>2</sup>Research Institute Sustainability - Helmholtz Centre Potsdam (RIFS Potsdam), Potsdam, 14467, Germany

<sup>3</sup>U.S. Environmental Protection Agency, Washington DC 20460, USA

<sup>4</sup>Institute of Environmental Protection, National Research Institute, Poland

<sup>5</sup>Department of Climate, Air and Sustainability, TNO, Utrecht, The Netherlands

<sup>6</sup>Asia Center for Air Pollution Research (ACAP), 1182 Sowa, Nishi-ku, Niigata-shi 950-2144, Japan

<sup>7</sup>Japan Automobile Research Institute (JARI), Tsukuba, 305-0822, Japan

<sup>8</sup>Air Quality Policy-Issue Response Section, Canadian Centre for Meteorological and Environmental Prediction, Environment and Climate Change Canada (ECCC), Dorval, Quebec, Canada

<sup>9</sup>International Institute for Applied Systems Analysis (IIASA), Laxenburg, Austria

<sup>10</sup>Joint Global Change Research Institute, Pacific Northwest National Lab, College Park, MD, USA

<sup>11</sup>UniSystems Company, Milan (Italy)

<sup>12</sup>State Key Joint Laboratory of Environmental Simulation and Pollution Control, School of Environment, Tsinghua University, Beijing 100084, China

<sup>13</sup>Department of Civil and Environmental Engineering, Konkuk University, Seoul, South Korea

<sup>14</sup>Department of Technology Fusion Engineering, Konkuk University, Seoul, South Korea

<sup>15</sup>National Institute for Environmental Studies (NIES), Tsukuba, 305-8506, Japan

<sup>16</sup>Air Quality Research Division, Environment and Climate Change Canada, Toronto, Ontario, Canada

<sup>17</sup>U.S. Environmental Protection Agency, North Carolina, USA

<sup>18</sup>Ministry of Education Key Laboratory for Earth System Modeling, Department of Earth System Science, Tsinghua University, Beijing 100084, China

Correspondence to: [monica.crippa@ec.europa.eu](mailto:monica.crippa@ec.europa.eu)

## S1 - Matching tables between inventory providers and HTAP\_v3 sectors and regions

Table S1 – Sector matching table between inventory providers and HTAP\_v3 sectors

|                                         | REASv3.2.1                                   | CAPSS-KU                                                                           | JAPAN                                                                                                                          | US EPA                                                                       | ECCC                                                                                           | CAMS-REGv6.1            | MEICv1.4 |
|-----------------------------------------|----------------------------------------------|------------------------------------------------------------------------------------|--------------------------------------------------------------------------------------------------------------------------------|------------------------------------------------------------------------------|------------------------------------------------------------------------------------------------|-------------------------|----------|
| <b>HTAP_1: International Shipping</b>   | -                                            | -                                                                                  | -                                                                                                                              | -                                                                            | -                                                                                              | -                       | -        |
| <b>HTAP_2.1: Domestic Aviation</b>      |                                              | SCC Level3 domestic airport traffic                                                | 1.A.3.a.i.(i) Civil aviation (domestic, landing/take-off (LTO))                                                                | 1A3aii_Domestic-aviation                                                     | Landing & Takeoff<br>1A3ai(i) and 1A3aii(i)                                                    | H_Aviation, O_AviCruise | -        |
| <b>HTAP_2.2: International Aviation</b> | -                                            | -                                                                                  | -                                                                                                                              | -                                                                            | -                                                                                              | -                       | -        |
| <b>HTAP_3: Energy</b>                   | POWER_PLANTS_POINT<br>POWER_PLANTS_NON-POINT | SCC Level1 Energy Industry (Power Generation)                                      | 1.A.1.a Public electricity and heat production                                                                                 | 1A1a_Public-Electricity<br>1A1a_Industrial-Electricity                       | 1A1a_Public-Electricity<br>1A1a_Industrial-Electricity                                         | A_PublicPower           | Power    |
| <b>HTAP_4.1: Industry</b>               | INDUSTRY                                     | SCC Level1 Combustion in manufacturing industry<br>SCC Level1 Industrial processes | 1.A.2 All components<br>2.A Mineral products<br>2.B Chemical industry<br>2.C Metal production<br>2.H Other industry production | 1A2 All components<br>2 All components (excluding 2D)<br>6A_Other-commercial | 1A2 All components, excluding Fugitive<br>2 All components (excluding 2D & excluding Fugitive) | B_Industry              | Industry |
| <b>HTAP_4.2: Fugitive</b>               | EXTRACTION                                   | SCC Level1 Energy storage and distribution<br>SCC Level2                           | 1.A.1.c Manufacture of solid fuels and other energy industries<br>1.A.1.b Petroleum                                            | 1B2 All components<br>1A1b_Pet-refining<br>1A1c Coke-ovens                   | Fugitive components of 1A2<br>1B2 All                                                          | D_Fugitive              | Fugitive |

|                                         |                 |                                                                                       |                                               |                                                                                 |                                             |                                          |                        |
|-----------------------------------------|-----------------|---------------------------------------------------------------------------------------|-----------------------------------------------|---------------------------------------------------------------------------------|---------------------------------------------|------------------------------------------|------------------------|
|                                         |                 | charcoal manufacturing                                                                | refining<br>1.B Fugitive emissions from fuels | 1A1g_Other-energy-transf                                                        | components<br>2A5                           |                                          |                        |
| <b>HTAP_4.3: Solvents</b>               | SOLVENT         | SCC Level1<br>Solvent use                                                             | 2.D Other solvent and product use             | 2D All components                                                               | Solvent portions of<br>1A2, 1B2, 2D and 2L  | E Solvents                               | Solvents               |
| <b>HTAP_5.1: Road Transport</b>         | ROAD_TRANSPORT  | on-road mobile                                                                        | 1.A.3.b.i, ii, iii, iv, v<br>Road transport   | 1A3bii_Road (combustion)                                                        | 1A3bi – iv                                  | F_RoadTransport (excluding resuspension) | Road_transport         |
| <b>HTAP_5.2: Brake and Tyre wear</b>    | -               | SCC Level2<br>paved road<br>SCC Level2<br>unpaved road<br>SCC Level2 tire wear        | 1.A.3.b.vi, vii Road transport                | 1A3b_Road-noncomb                                                               | 1A3bv – vii<br>6A Road Dust                 | F_RoadTransport (resuspension only)      | -                      |
| <b>HTAP_5.3: Domestic shipping</b>      | -               | SCC Level2<br>Inland waterways<br>SCC Level3<br>national sea traffic within EMEP area | -                                             | 1A3dii_Domestic-navigation (shipping)<br>1A5_Recreational-Equipment-Marine      | 1A3dii                                      | G_Shipping                               | Domestic_shipping      |
| <b>HTAP_5.4: Other ground transport</b> | OTHER_TRANSPORT | SCC Level2<br>Railways                                                                | 1.A.3.c Railways                              | 1A3c_Rail<br>1A3eii_Other-unspecified-transp<br>1A5_Recreational-Equipment-Land | 1A2gvii Off road<br>1A3c<br>1A3ei<br>1A4bii | I_Offroad                                | Other_ground_transport |

|                                             |                   |                                                                                                                                    |                                            |                                                       |                                                                                                                  |                                                    |                       |
|---------------------------------------------|-------------------|------------------------------------------------------------------------------------------------------------------------------------|--------------------------------------------|-------------------------------------------------------|------------------------------------------------------------------------------------------------------------------|----------------------------------------------------|-----------------------|
| <b>HTAP_6: Residential</b>                  | DOMESTIC          | SCC Level1 Non-industrial combustion plants<br>SCC Level2 Agriculture<br>SCC Level2 construction machinery<br>SCC Level2 fireplace | 1.A.4 All components                       | 1A4 All components                                    | 1A4 All components<br>2D3e Commercial residential<br>2H2 Meat grilling<br>6A cigarette smoking, Structural fires | C_OtherStationaryComb                              | Residential           |
| <b>HTAP_7: Waste</b>                        | -                 | SCC Level1 Waste treatment and disposal<br>SCC Level2 waste disposal                                                               | 5. Waste                                   | 5 All components                                      | 5 All components                                                                                                 | J Waste                                            | -                     |
| <b>HTAP_8.1: Agricultural waste burning</b> | -                 | SCC Level2 agricultural residue burning                                                                                            | 3.F Field burning of agricultural residues | 3F Ag-res-on-field                                    | 6A Prescribed Burning (forest)                                                                                   | L_AgriOther (agricultural waste burning only)      | -                     |
| <b>HTAP_8.2: Agriculture_livestock</b>      | MANURE_MANAGEMENT | SCC Level2 Manure management<br>SCC Level2 Stockbreeding activity                                                                  | 3.B Manure management                      | 3B All components                                     | 3B All components                                                                                                | K_AgriLivestock                                    | Agriculture_livestock |
| <b>HTAP_8.3: Agriculture_crops</b>          | FERTILIZER        | SCC Level2 Cultures with fertilizers (except animal manure)<br>SCC Level2 Agriculture activity                                     | 3.D Crop production and agricultural soils | 3Da1_Inorganic-N-fertilizers<br>3Df_Use-of-pesticides | 3D All components                                                                                                | L_AgriOther (excluding agricultural waste burning) | Agriculture_crops     |

**Table S2 – Country mapping to inventory providers and regional belonging to IPCC AR6 regions.**

| <b>Data provider</b> | <b>Country code ISO_A3</b> | <b>Country name</b>    | <b>IPCC AR6 regional grouping</b> |
|----------------------|----------------------------|------------------------|-----------------------------------|
| CAMS-REG-v6.1        | ALB                        | Albania                | Europe                            |
| CAMS-REG-v6.1        | AUT                        | Austria                | Europe                            |
| CAMS-REG-v6.1        | BEL                        | Belgium                | Europe                            |
| CAMS-REG-v6.1        | BGR                        | Bulgaria               | Europe                            |
| CAMS-REG-v6.1        | BIH                        | Bosnia and Herzegovina | Europe                            |
| CAMS-REG-v6.1        | BLR                        | Belarus                | Eurasia                           |
| CAMS-REG-v6.1        | CHE                        | Switzerland            | Europe                            |
| CAMS-REG-v6.1        | CYP                        | Cyprus                 | Europe                            |
| CAMS-REG-v6.1        | CZE                        | Czech Republic         | Europe                            |
| CAMS-REG-v6.1        | DEU                        | Germany                | Europe                            |
| CAMS-REG-v6.1        | DNK                        | Denmark                | Europe                            |
| CAMS-REG-v6.1        | ESP                        | Spain                  | Europe                            |
| CAMS-REG-v6.1        | EST                        | Estonia                | Europe                            |
| CAMS-REG-v6.1        | FIN                        | Finland                | Europe                            |
| CAMS-REG-v6.1        | FRA                        | France                 | Europe                            |
| CAMS-REG-v6.1        | GBR                        | United Kingdom         | Europe                            |
| CAMS-REG-v6.1        | GRC                        | Greece                 | Europe                            |
| CAMS-REG-v6.1        | HRV                        | Croatia                | Europe                            |
| CAMS-REG-v6.1        | HUN                        | Hungary                | Europe                            |
| CAMS-REG-v6.1        | IRL                        | Ireland                | Europe                            |
| CAMS-REG-v6.1        | ISL                        | Iceland                | Europe                            |
| CAMS-REG-v6.1        | ITA                        | Italy                  | Europe                            |
| CAMS-REG-v6.1        | LTU                        | Lithuania              | Europe                            |
| CAMS-REG-v6.1        | LUX                        | Luxembourg             | Europe                            |
| CAMS-REG-v6.1        | LVA                        | Latvia                 | Europe                            |

|               |     |                                            |                                        |
|---------------|-----|--------------------------------------------|----------------------------------------|
| CAMS-REG-v6.1 | MDA | Moldova, Republic of                       | Eurasia                                |
| CAMS-REG-v6.1 | MKD | Macedonia, the former Yugoslav Republic of | Eurasia                                |
| CAMS-REG-v6.1 | MLT | Malta                                      | Europe                                 |
| CAMS-REG-v6.1 | MNE | Montenegro                                 | Europe                                 |
| CAMS-REG-v6.1 | NLD | Netherlands                                | Europe                                 |
| CAMS-REG-v6.1 | NOR | Norway                                     | Europe                                 |
| CAMS-REG-v6.1 | POL | Poland                                     | Europe                                 |
| CAMS-REG-v6.1 | PRT | Portugal                                   | Europe                                 |
| CAMS-REG-v6.1 | ROU | Romania                                    | Europe                                 |
| CAMS-REG-v6.1 | SRB | Serbia                                     | Europe                                 |
| CAMS-REG-v6.1 | SVK | Slovakia                                   | Europe                                 |
| CAMS-REG-v6.1 | SVN | Slovenia                                   | Europe                                 |
| CAMS-REG-v6.1 | SWE | Sweden                                     | Europe                                 |
| CAMS-REG-v6.1 | TUR | Turkey                                     | Europe                                 |
| CAMS-REG-v6.1 | UKR | Ukraine                                    | Europe                                 |
| CAMS-REG-v6.1 | KOS | Kosovo                                     | Europe                                 |
| CAPSS-KU      | KOR | Korea, Republic of                         | Eastern Asia                           |
| ECCC          | CAN | Canada                                     | North America                          |
| EDGARv8       | ABW | Aruba                                      | Latin America and Caribbean            |
| EDGARv8       | AGO | Angola                                     | Africa                                 |
| EDGARv8       | AIA | Anguilla                                   | Latin America and Caribbean            |
| EDGARv8       | AIR | Int. Aviation                              | Int. Aviation                          |
| EDGARv8       | ANT | Netherlands Antilles                       | Latin America and Caribbean            |
| EDGARv8       | ARE | United Arab Emirates                       | Middle East                            |
| EDGARv8       | ARG | Argentina                                  | Latin America and Caribbean            |
| EDGARv8       | ARM | Armenia                                    | Eurasia                                |
| EDGARv8       | ASM | American Samoa                             | South-East Asia and developing Pacific |
| EDGARv8       | ATG | Antigua and Barbuda                        | Latin America and Caribbean            |
| EDGARv8       | AUS | Australia                                  | Asia-Pacific Developed                 |
| EDGARv8       | AZE | Azerbaijan                                 | Eurasia                                |
| EDGARv8       | BDI | Burundi                                    | Africa                                 |
| EDGARv8       | BEN | Benin                                      | Africa                                 |
| EDGARv8       | BFA | Burkina Faso                               | Africa                                 |
| EDGARv8       | BHR | Bahrain                                    | Middle East                            |

|         |     |                                       |                                        |
|---------|-----|---------------------------------------|----------------------------------------|
| EDGARv8 | BHS | Bahamas                               | Latin America and Caribbean            |
| EDGARv8 | BLZ | Belize                                | Latin America and Caribbean            |
| EDGARv8 | BMU | Bermuda                               | Latin America and Caribbean            |
| EDGARv8 | BOL | Bolivia                               | Latin America and Caribbean            |
| EDGARv8 | BRA | Brazil                                | Latin America and Caribbean            |
| EDGARv8 | BRB | Barbados                              | Latin America and Caribbean            |
| EDGARv8 | BWA | Botswana                              | Africa                                 |
| EDGARv8 | CAF | Central African Republic              | Africa                                 |
| EDGARv8 | CHL | Chile                                 | Latin America and Caribbean            |
| EDGARv8 | CIV | Cote d'Ivoire                         | Africa                                 |
| EDGARv8 | CMR | Cameroon                              | Africa                                 |
| EDGARv8 | COD | Congo, the Democratic Republic of the | Africa                                 |
| EDGARv8 | COG | Congo                                 | Africa                                 |
| EDGARv8 | COK | Cook Islands                          | South-East Asia and developing Pacific |
| EDGARv8 | COL | Colombia                              | Latin America and Caribbean            |
| EDGARv8 | COM | Comoros                               | Africa                                 |
| EDGARv8 | CPV | Cape Verde                            | Africa                                 |
| EDGARv8 | CRI | Costa Rica                            | Latin America and Caribbean            |
| EDGARv8 | CUB | Cuba                                  | Latin America and Caribbean            |
| EDGARv8 | CYM | Cayman Islands                        | Latin America and Caribbean            |
| EDGARv8 | DJI | Djibouti                              | Africa                                 |
| EDGARv8 | DMA | Dominica                              | Latin America and Caribbean            |
| EDGARv8 | DOM | Dominican Republic                    | Latin America and Caribbean            |
| EDGARv8 | DZA | Algeria                               | Africa                                 |
| EDGARv8 | ECU | Ecuador                               | Latin America and Caribbean            |
| EDGARv8 | EGY | Egypt                                 | Africa                                 |
| EDGARv8 | ERI | Eritrea                               | Africa                                 |
| EDGARv8 | ESH | Western Sahara                        | Africa                                 |
| EDGARv8 | ETH | Ethiopia                              | Africa                                 |
| EDGARv8 | FJI | Fiji                                  | South-East Asia and developing Pacific |
| EDGARv8 | FLK | Falkland Islands (Malvinas)           | Latin America and Caribbean            |
| EDGARv8 | FRO | Faroe Islands                         | Europe                                 |
| EDGARv8 | FSM | Micronesia, Federated States of       | South-East Asia and developing Pacific |
| EDGARv8 | GAB | Gabon                                 | Africa                                 |
| EDGARv8 | GEO | Georgia                               | Eurasia                                |
| EDGARv8 | GHA | Ghana                                 | Africa                                 |
| EDGARv8 | GIB | Gibraltar                             | Europe                                 |
| EDGARv8 | GIN | Guinea                                | Africa                                 |
| EDGARv8 | GLP | Guadeloupe                            | Latin America and Caribbean            |
| EDGARv8 | GMB | Gambia                                | Africa                                 |
| EDGARv8 | GNB | Guinea-Bissau                         | Africa                                 |
| EDGARv8 | GNQ | Equatorial Guinea                     | Africa                                 |
| EDGARv8 | GRD | Grenada                               | Latin America and Caribbean            |

|         |     |                           |                                        |
|---------|-----|---------------------------|----------------------------------------|
| EDGARv8 | GRL | Greenland                 | Europe                                 |
| EDGARv8 | GTM | Guatemala                 | Latin America and Caribbean            |
| EDGARv8 | GUF | French Guiana             | Latin America and Caribbean            |
| EDGARv8 | GUM | Guam                      | South-East Asia and developing Pacific |
| EDGARv8 | GUY | Guyana                    | Latin America and Caribbean            |
| EDGARv8 | HKG | Hong Kong                 | Eastern Asia                           |
| EDGARv8 | HND | Honduras                  | Latin America and Caribbean            |
| EDGARv8 | HTI | Haiti                     | Latin America and Caribbean            |
| EDGARv8 | IRN | Iran, Islamic Republic of | Middle East                            |
| EDGARv8 | IRQ | Iraq                      | Middle East                            |
| EDGARv8 | ISR | Israel                    | Middle East                            |
| EDGARv8 | JAM | Jamaica                   | Latin America and Caribbean            |
| EDGARv8 | JOR | Jordan                    | Middle East                            |
| EDGARv8 | KAZ | Kazakhstan                | Eurasia                                |
| EDGARv8 | KEN | Kenya                     | Africa                                 |
| EDGARv8 | KGZ | Kyrgyzstan                | Eurasia                                |
| EDGARv8 | KIR | Kiribati                  | South-East Asia and developing Pacific |
| EDGARv8 | KNA | Saint Kitts and Nevis     | Latin America and Caribbean            |
| EDGARv8 | KWT | Kuwait                    | Middle East                            |
| EDGARv8 | LBN | Lebanon                   | Middle East                            |
| EDGARv8 | LBR | Liberia                   | Africa                                 |
| EDGARv8 | LBY | Libyan Arab Jamahiriya    | Africa                                 |
| EDGARv8 | LCA | Saint Lucia               | Latin America and Caribbean            |
| EDGARv8 | LSO | Lesotho                   | Africa                                 |
| EDGARv8 | MAC | Macao                     | Eastern Asia                           |
| EDGARv8 | MAR | Morocco                   | Africa                                 |
| EDGARv8 | MDG | Madagascar                | Africa                                 |
| EDGARv8 | MEX | Mexico                    | Latin America and Caribbean            |
| EDGARv8 | MLI | Mali                      | Africa                                 |
| EDGARv8 | MOZ | Mozambique                | Africa                                 |
| EDGARv8 | MRT | Mauritania                | Africa                                 |
| EDGARv8 | MSR | Montserrat                | Latin America and Caribbean            |
| EDGARv8 | MTQ | Martinique                | Latin America and Caribbean            |
| EDGARv8 | MUS | Mauritius                 | Africa                                 |
| EDGARv8 | MWI | Malawi                    | Africa                                 |
| EDGARv8 | MYT | Mayotte                   | Africa                                 |
| EDGARv8 | NAM | Namibia                   | Africa                                 |
| EDGARv8 | NCL | New Caledonia             | South-East Asia and developing Pacific |
| EDGARv8 | NER | Niger                     | Africa                                 |
| EDGARv8 | NGA | Nigeria                   | Africa                                 |
| EDGARv8 | NIC | Nicaragua                 | Latin America and Caribbean            |
| EDGARv8 | NIU | Niue                      | South-East Asia and developing Pacific |
| EDGARv8 | NZL | New Zealand               | Asia-Pacific Developed                 |



|         |     |                                  |                                        |
|---------|-----|----------------------------------|----------------------------------------|
| EDGARv8 | OMN | Oman                             | Middle East                            |
| EDGARv8 | PAN | Panama                           | Latin America and Caribbean            |
| EDGARv8 | PER | Peru                             | Latin America and Caribbean            |
| EDGARv8 | PLW | Palau                            | South-East Asia and developing Pacific |
| EDGARv8 | PNG | Papua New Guinea                 | South-East Asia and developing Pacific |
| EDGARv8 | PRY | Paraguay                         | Latin America and Caribbean            |
| EDGARv8 | PYF | French Polynesia                 | South-East Asia and developing Pacific |
| EDGARv8 | QAT | Qatar                            | Middle East                            |
| EDGARv8 | REU | Reunion                          | Africa                                 |
| EDGARv8 | RUS | Russian Federation               | Eurasia                                |
| EDGARv8 | RWA | Rwanda                           | Africa                                 |
| EDGARv8 | SAU | Saudi Arabia                     | Middle East                            |
| EDGARv8 | SDN | Sudan                            | Africa                                 |
| EDGARv8 | SEA | Int. Shipping                    | Int. Shipping                          |
| EDGARv8 | SEN | Senegal                          | Africa                                 |
| EDGARv8 | SHN | Saint Helena                     | Africa                                 |
| EDGARv8 | SLB | Solomon Islands                  | South-East Asia and developing Pacific |
| EDGARv8 | SLE | Sierra Leone                     | Africa                                 |
| EDGARv8 | SLV | El Salvador                      | Latin America and Caribbean            |
| EDGARv8 | SOM | Somalia                          | Africa                                 |
| EDGARv8 | SPM | Saint Pierre and Miquelon        | North America                          |
| EDGARv8 | STP | Sao Tome and Principe            | Africa                                 |
| EDGARv8 | SUR | Suriname                         | Latin America and Caribbean            |
| EDGARv8 | SWZ | Swaziland                        | Africa                                 |
| EDGARv8 | SYC | Seychelles                       | Africa                                 |
| EDGARv8 | SYR | Syrian Arab Republic             | Middle East                            |
| EDGARv8 | TCA | Turks and Caicos Islands         | Latin America and Caribbean            |
| EDGARv8 | TCD | Chad                             | Africa                                 |
| EDGARv8 | TGO | Togo                             | Africa                                 |
| EDGARv8 | TJK | Tajikistan                       | Eurasia                                |
| EDGARv8 | TKL | Tokelau                          | South-East Asia and developing Pacific |
| EDGARv8 | TKM | Turkmenistan                     | Eurasia                                |
| EDGARv8 | TLS | Timor-Leste                      | South-East Asia and developing Pacific |
| EDGARv8 | TON | Tonga                            | South-East Asia and developing Pacific |
| EDGARv8 | TTO | Trinidad and Tobago              | Latin America and Caribbean            |
| EDGARv8 | TUN | Tunisia                          | Africa                                 |
| EDGARv8 | TZA | Tanzania, United Republic of     | Africa                                 |
| EDGARv8 | UGA | Uganda                           | Africa                                 |
| EDGARv8 | URY | Uruguay                          | Latin America and Caribbean            |
| EDGARv8 | UZB | Uzbekistan                       | Eurasia                                |
| EDGARv8 | VCT | Saint Vincent and the Grenadines | Latin America and Caribbean            |

|          |     |                                        |                                        |
|----------|-----|----------------------------------------|----------------------------------------|
| EDGARv8  | VEN | Venezuela                              | Latin America and Caribbean            |
| EDGARv8  | VGB | Virgin Islands, British                | Latin America and Caribbean            |
| EDGARv8  | VUT | Vanuatu                                | South-East Asia and developing Pacific |
| EDGARv8  | WLF | Wallis and Futuna                      | South-East Asia and developing Pacific |
| EDGARv8  | WSM | Samoa                                  | South-East Asia and developing Pacific |
| EDGARv8  | YEM | Yemen                                  | Middle East                            |
| EDGARv8  | ZAF | South Africa                           | Africa                                 |
| EDGARv8  | ZMB | Zambia                                 | Africa                                 |
| EDGARv8  | ZWE | Zimbabwe                               | Africa                                 |
| JAPAN    | JPN | Japan                                  | Asia-Pacific Developed                 |
| MEICv.14 | CHN | China                                  | Eastern Asia                           |
| REAS     | AFG | Afghanistan                            | Southern Asia                          |
| REAS     | BGD | Bangladesh                             | Southern Asia                          |
| REAS     | BRN | Brunei Darussalam                      | South-East Asia and developing Pacific |
| REAS     | BTN | Bhutan                                 | Southern Asia                          |
| REAS     | IDN | Indonesia                              | South-East Asia and developing Pacific |
| REAS     | IND | India                                  | Southern Asia                          |
| REAS     | KHM | Cambodia                               | South-East Asia and developing Pacific |
| REAS     | LAO | Lao People's Democratic Republic       | South-East Asia and developing Pacific |
| REAS     | LKA | Sri Lanka                              | Southern Asia                          |
| REAS     | MDV | Maldives                               | Southern Asia                          |
| REAS     | MMR | Myanmar                                | South-East Asia and developing Pacific |
| REAS     | MNG | Mongolia                               | Eastern Asia                           |
| REAS     | MYS | Malaysia                               | South-East Asia and developing Pacific |
| REAS     | NPL | Nepal                                  | Southern Asia                          |
| REAS     | PAK | Pakistan                               | Southern Asia                          |
| REAS     | PHL | Philippines                            | South-East Asia and developing Pacific |
| REAS     | PRK | Korea, Democratic People's Republic of | Eastern Asia                           |
| REAS     | SGP | Singapore                              | South-East Asia and developing Pacific |
| REAS     | THA | Thailand                               | South-East Asia and developing Pacific |
| REAS     | TWN | Taiwan, Province of China              | Eastern Asia                           |
| REAS     | VNM | Viet Nam                               | South-East Asia and developing Pacific |
| US EPA   | PRI | Puerto Rico                            | North America                          |
| US EPA   | USA | United States                          | North America                          |
| US EPA   | VIR | Virgin Islands, USA                    | North America                          |

## S2 – Comparison of HTAP\_v3.1 emission mosaic vs. regional and global inventories

In this section, the comparison between the HTAP\_v3.1 mosaic emission time series by pollutant and region and the corresponding emissions from other inventories is presented (Figures S1-S5). In particular, we compare HTAP\_v3.1 against CEDS\_v2024\_07\_08 (Hoesly et al., 2024), EDGARv8.1 (which is used in HTAP\_v3.1 as gapfilling inventory, [https://edgar.jrc.ec.europa.eu/dataset\\_ap61](https://edgar.jrc.ec.europa.eu/dataset_ap61)), country inventories, GAINS\_(ECLIPSE\_v6b\_CLE) (Klimont et al., 2017), and REAS\_v3.2.1 (Kurokawa and Ohara, 2020) including the latest updates available at <https://www.nies.go.jp/REAS/>. In a few instances (Canada, China) multiple versions of the country inventories are available and the older version is plotted as “older\_country\_inv” in the first figure in each set below.

The country level inventories are from the US EPA (<https://www.epa.gov/air-emissions-inventories/air-pollutant-emissions-trends-data>; Version April 5, 2023), Environment and Climate Change Canada (<https://pollution-waste.canada.ca/air-emission-inventory>, downloaded August 2024), EMEP (<https://www.ceip.at/>, downloaded 2024), MEIC for China (Zheng et al 2018), Japan (PM2.5EI and J-STREAM), Korea (<http://airemiss.nier.go.kr/>; downloaded 2024) and Taiwan (<http://teds.epa.gov.tw/> various databases and documents downloaded in 2024).

For each emission species two graphs are shown. The first shows comparisons at the country level (and Eastern/western European regions) where we can compare HTAP\_v3.1 with the country-level inventory data as processed for CEDS. Note that CEDS is calibrated to the country level data shown in this graph, which means CEDS will generally align with the country-level data except where gap filling has taken place (as noted below). The second graph in each set below shows a comparison at the level of global regions, where we compare the three global inventories and, for Asia regions, REAS.

The graphs below exclude emissions from aviation, international shipping, and agricultural waste burning on fields. Note that, while we have attempted to harmonize geographic and sectoral coverage between the inventories, the correspondence is not always exact and this can lead to spurious differences. There are significant differences, for example, in how different inventories define the category “domestic shipping”. We, therefore, focus on larger differences where this potentially impacts interpretation of the HTAP\_v3.1 data.

### S2.1- Comparison of SO<sub>2</sub> emissions

Overall, HTAP\_v3.1 compares well with the country level data for SO<sub>2</sub>. The largest discrepancy is for Australia. The Australia National Pollutant Inventory (NPI; <http://www.npi.gov.au/>) provides annual data for point sources. For non-point sources, however, this only provides data for one representative year, which is also not necessarily consistent between states. For this reason, there is no consistent time series data available for total emissions from the NPI. The CEDS emission data uses default estimates for area sources, but calibrates emissions from power plants and industrial sources (for species where point sources dominate, such as SO<sub>2</sub> from metal smelters) to the Australia NPI data. HTAP\_v3.1 is based on EDGAR for Australia, as shown in the graph. While SO<sub>2</sub> values are similar by 2018, the NPI indicates that emissions were much higher than the HTAP\_v3.1 values by 2000.

There is also a small difference between inventories for China. While CEDS is calibrated to MEIC, CEDS also contains bottom-up estimates for metal smelting SO<sub>2</sub> emissions that are not

included in MEIC which increases total emissions in the mid to late 2000's. The difference becomes small by the end of the time series as increased penetration of acid production plants and pollution control devices is assumed to have substantially decreased SO<sub>2</sub> emissions from metal smelting.

At a regional level the largest differences between inventories, where the CEDS inventory has higher emissions than EDGAR (and HTAP\_v3.1) or GAINS, are in Latin America from metal smelting (derived from bottom-up mass balance estimates plus some country data in CEDS), and the Middle East, where CEDS has higher emissions from oil and gas operations (derived from OMI satellite measurements). Differences in SO<sub>2</sub> emissions between HTAP\_v3.1 and EDGAR\_v8 for the Islands<sup>1</sup> regional grouping is associated with the emissions from Maldives which are provided by the REAS inventory and not by EDGAR.

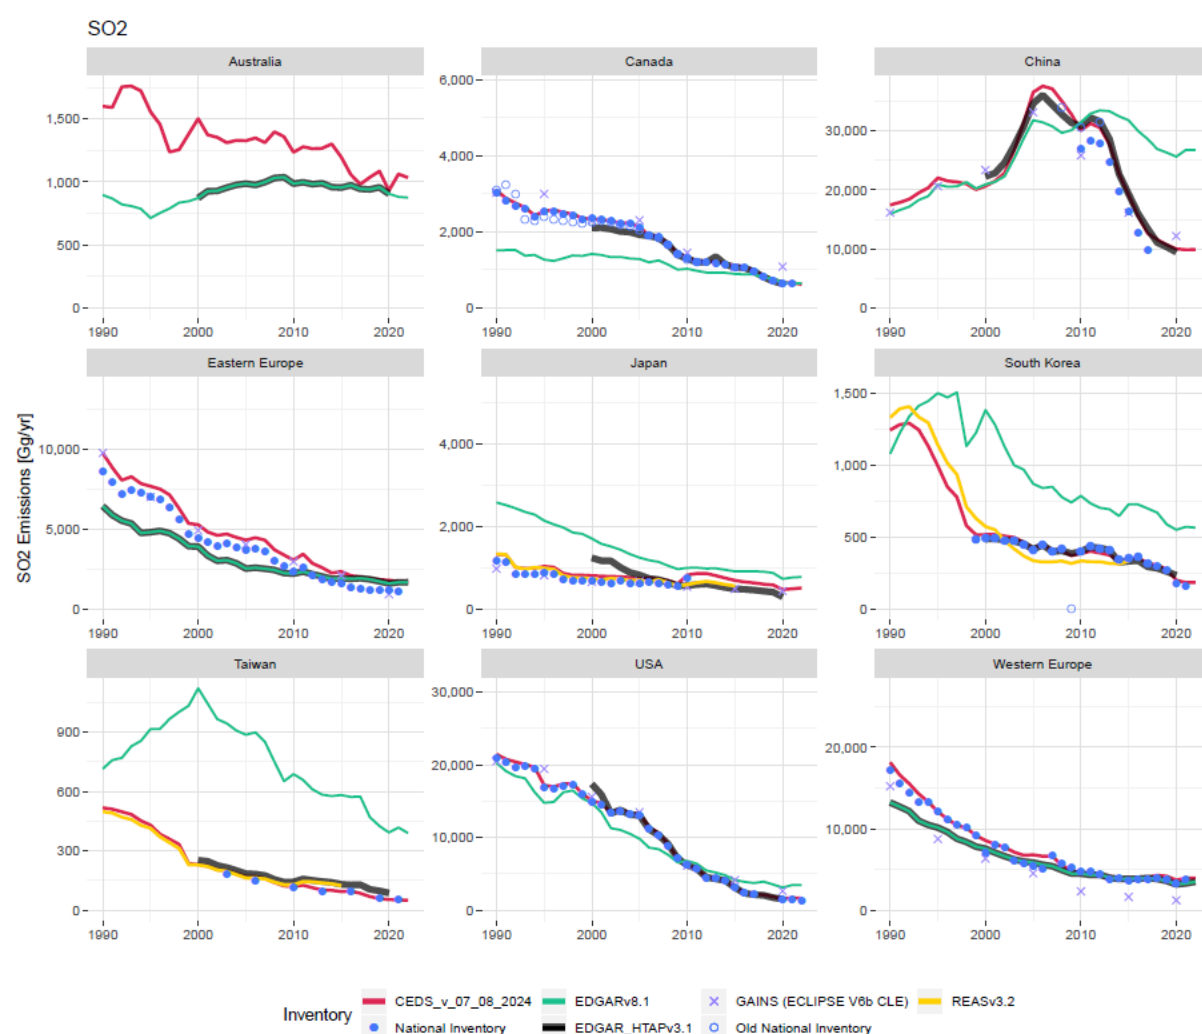

<sup>1</sup>In this comparison, 'Islands' includes emissions from: Cook Islands, Faeroe Islands, Maldives, Martinique, Niue, French Polynesia, Saint Pierre and Miquelon.

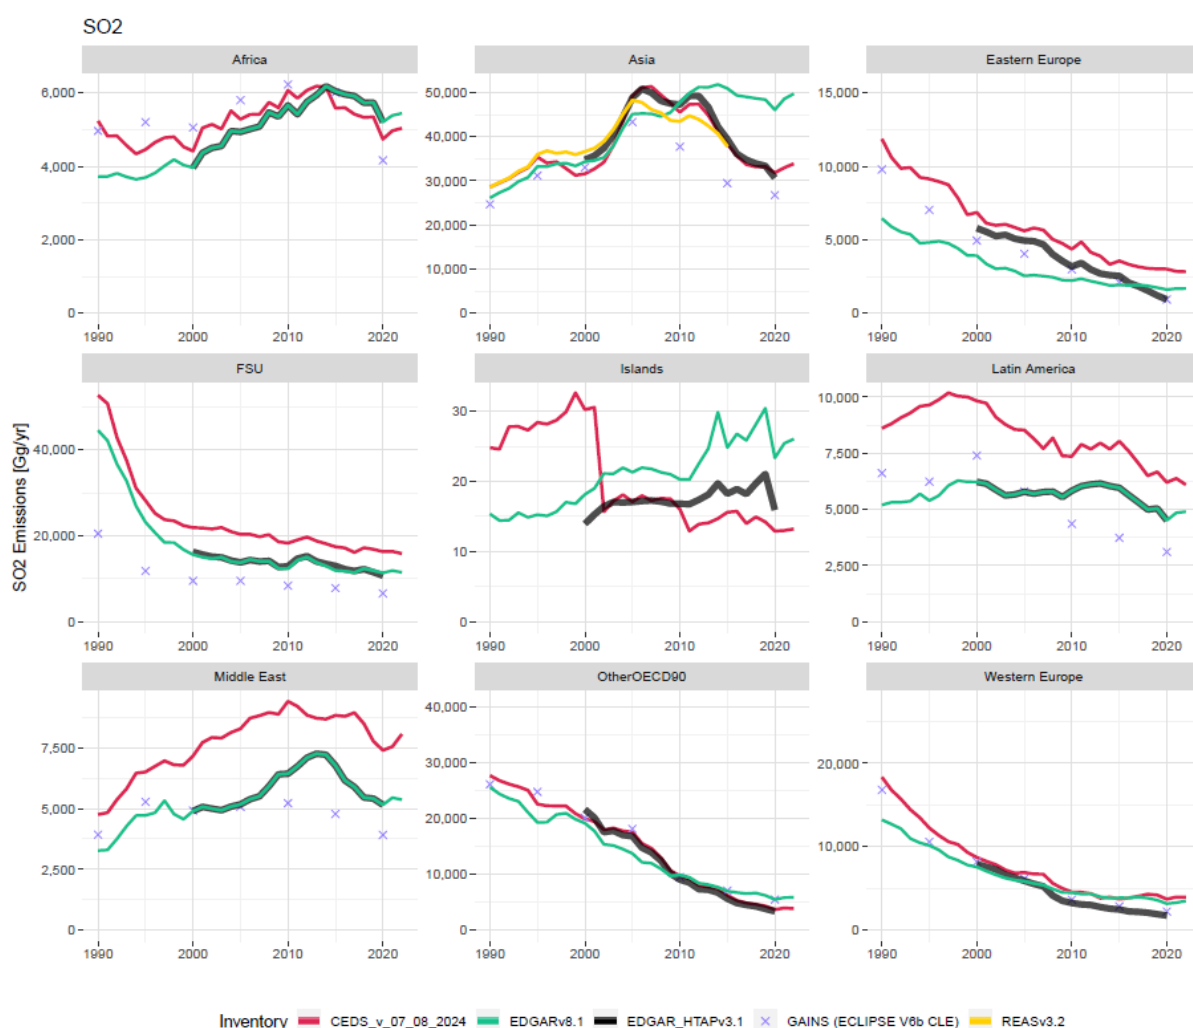

**Figure S1 – SO<sub>2</sub> emission time series comparison by world region as provided by different inventories and HTAP\_v3.1.**

## S2.2- Comparison of NO<sub>x</sub> emissions

Overall, HTAP\_v3.1 compares well with the country level data for NO<sub>x</sub> with general agreement between the inventories for most regions. Trends in Australia are particularly uncertain, however, since there is no country-level time series information for mobile sources, which are a major driver of trends in NO<sub>x</sub> emissions. The figure illustrates how different assumptions impact the estimated trends, which differ between EDGAR v8 (on which HTAP\_v3.1 is based), and CEDS (which uses emission factors from GAINS for mobile sources). The inventories also show different emission magnitudes for Japan. Possible drivers of differences include different assumptions about industrial sector emissions and the treatment of domestic shipping emissions, which are both significant contributors to emission totals in Japan. Similarly to SO<sub>2</sub>, also differences in NO<sub>x</sub> emissions between HTAP\_v3.1 and EDGAR\_v8 for the Islands regional grouping is associated with the emissions from Maldives which are provided by the REAS inventory and not by EDGAR.

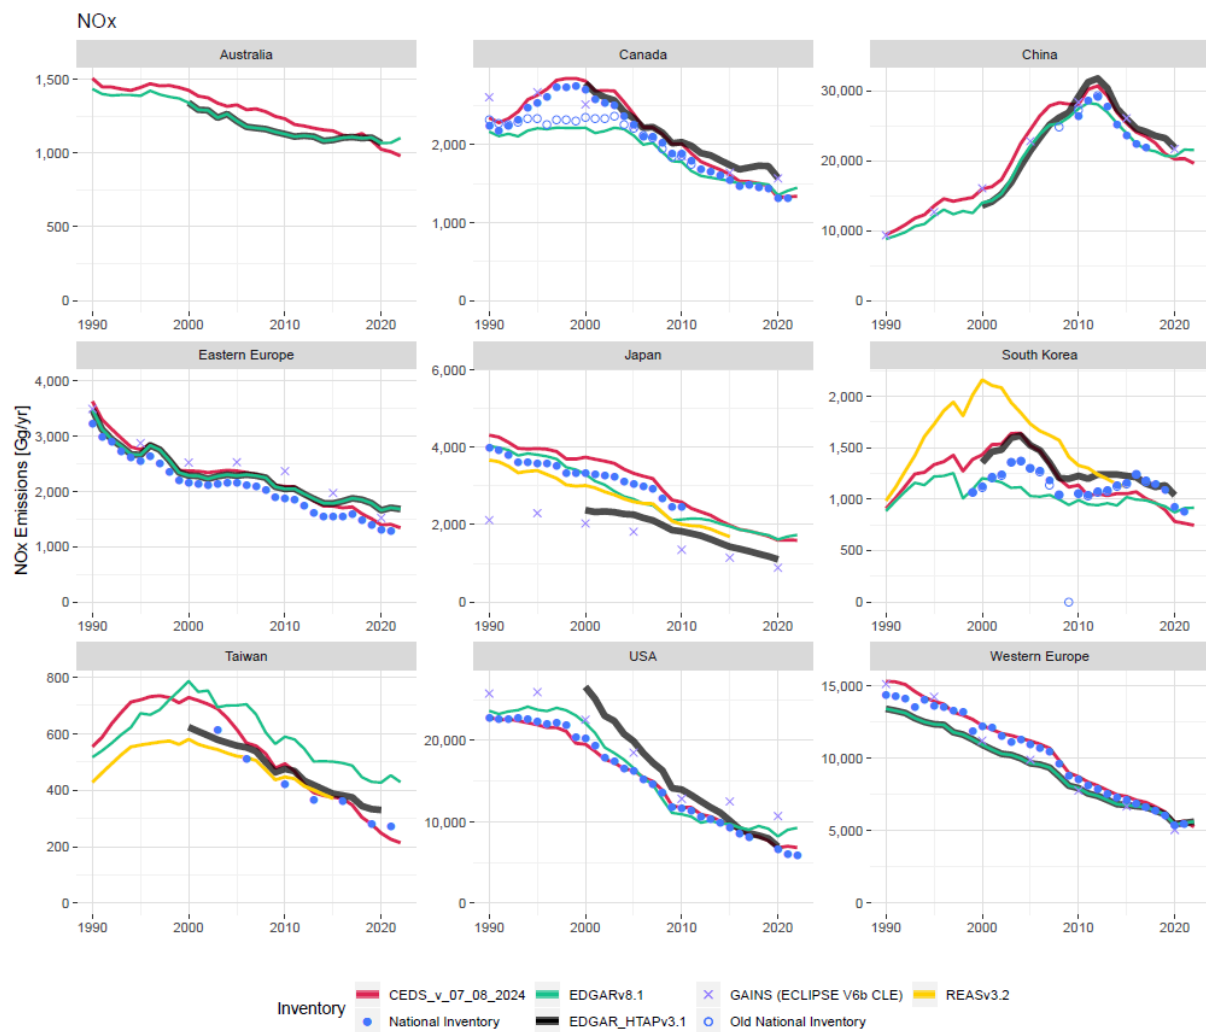

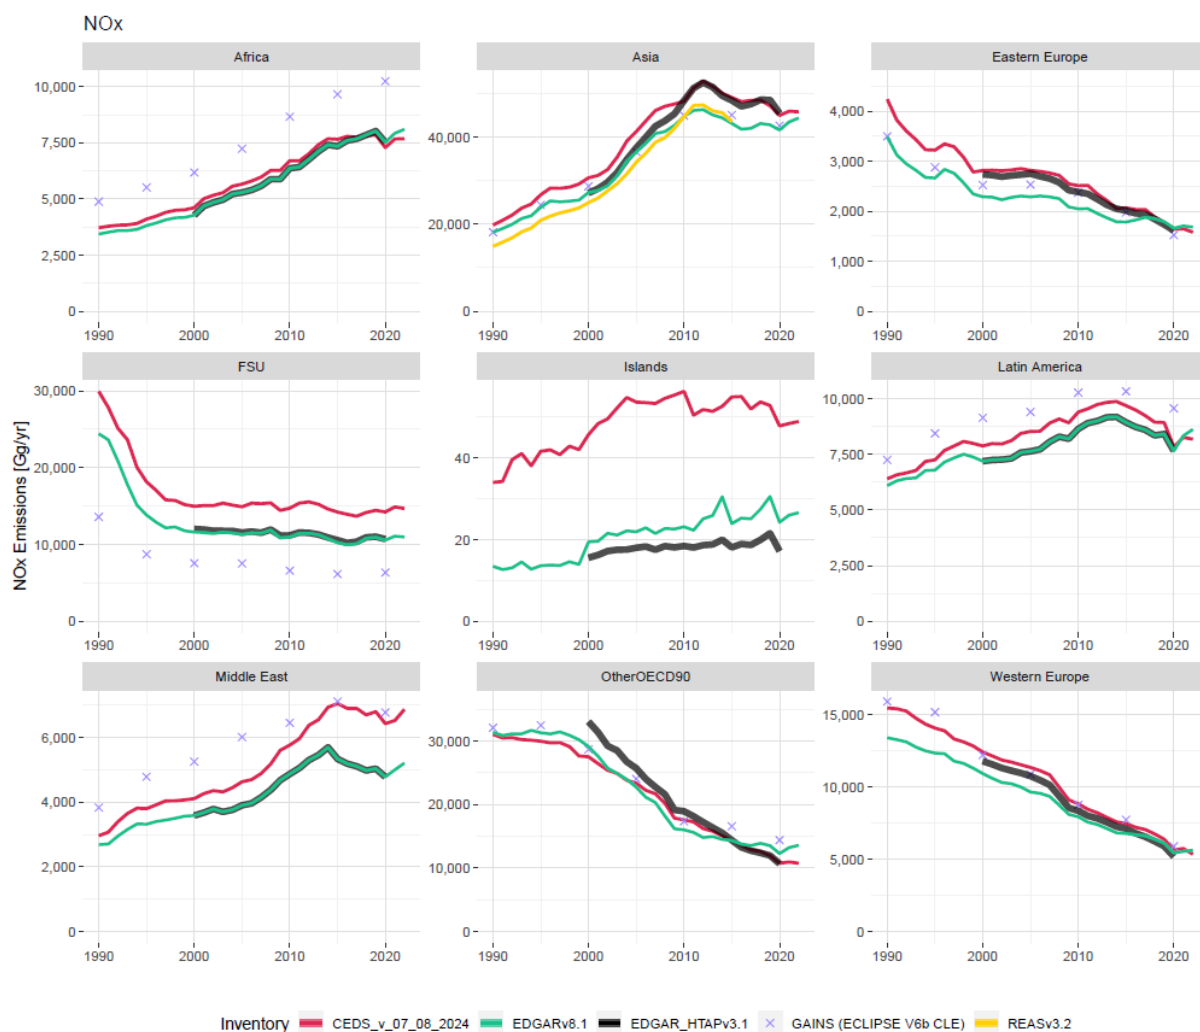

**Figure S2 – NOx emission time series comparison by world region as provided by different inventories and HTAP\_v3.1.**

### S2.3- Comparison of CO emissions

While HTAP\_v3.1 compares well with the country level data for CO, there is a large variation overall between the different global inventories. CO emission factors depend heavily on combustion process details which are difficult to capture with default regional emission factor assumptions. An example of this is shown for Canada, where CO emission estimates appear to have changed significantly in more recent versions of the inventory.

There is a particularly large difference in China by 2000, where HTAP\_v3.1 has CO emissions that peak around 2010, whereas CEDS has CO emissions peaking earlier and at a higher value, and EDGAR has no prominent peak in CO emissions. The difference is largely in the residential sector, with HTAP\_v3.1 residential CO emissions decreasing when going back from 2005 to 2000, whereas residential sector CO emissions increase in CEDS driven by increases in residential biomass combustion when going back from 2005 to 2000.

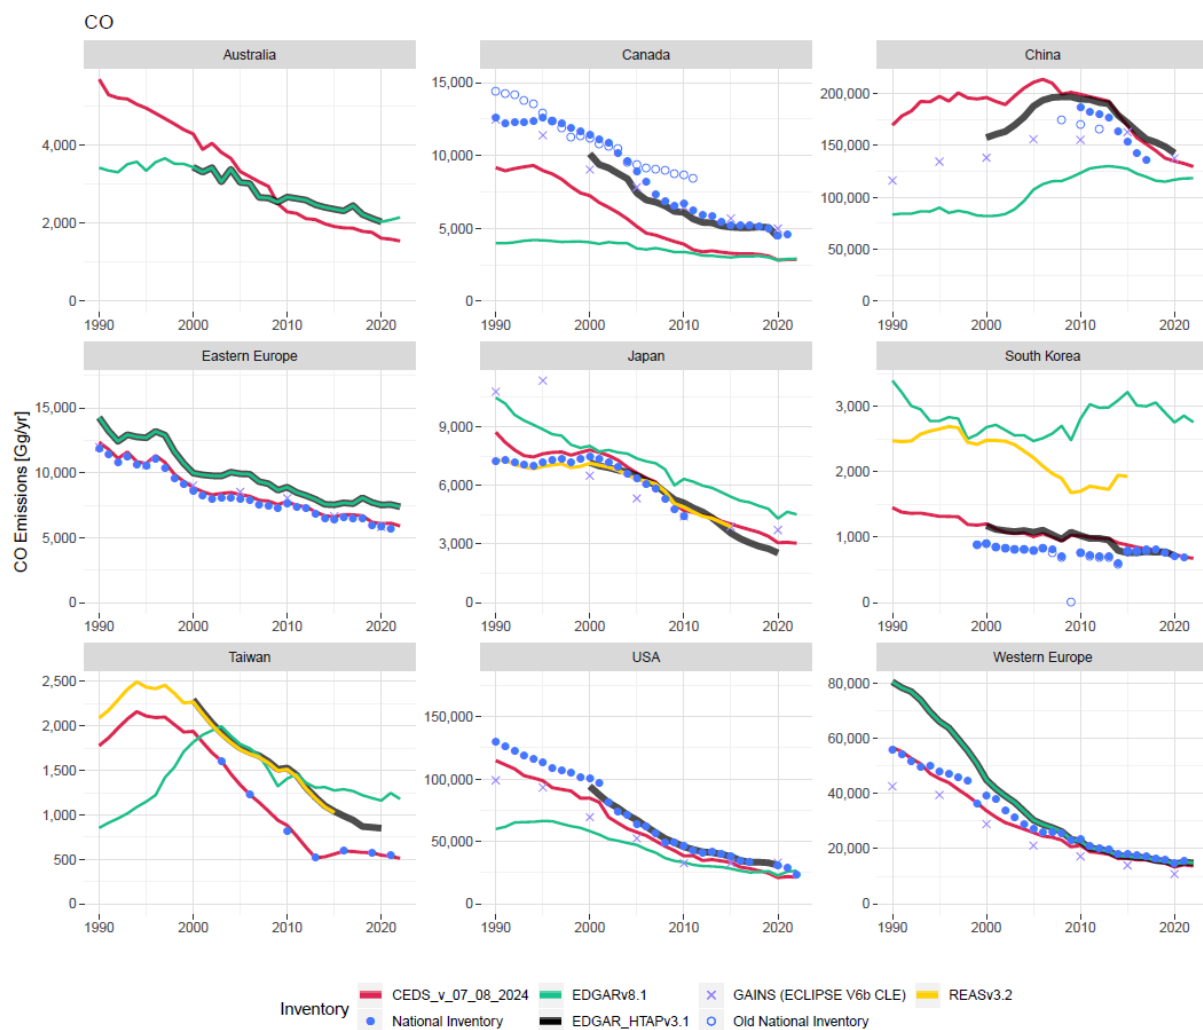



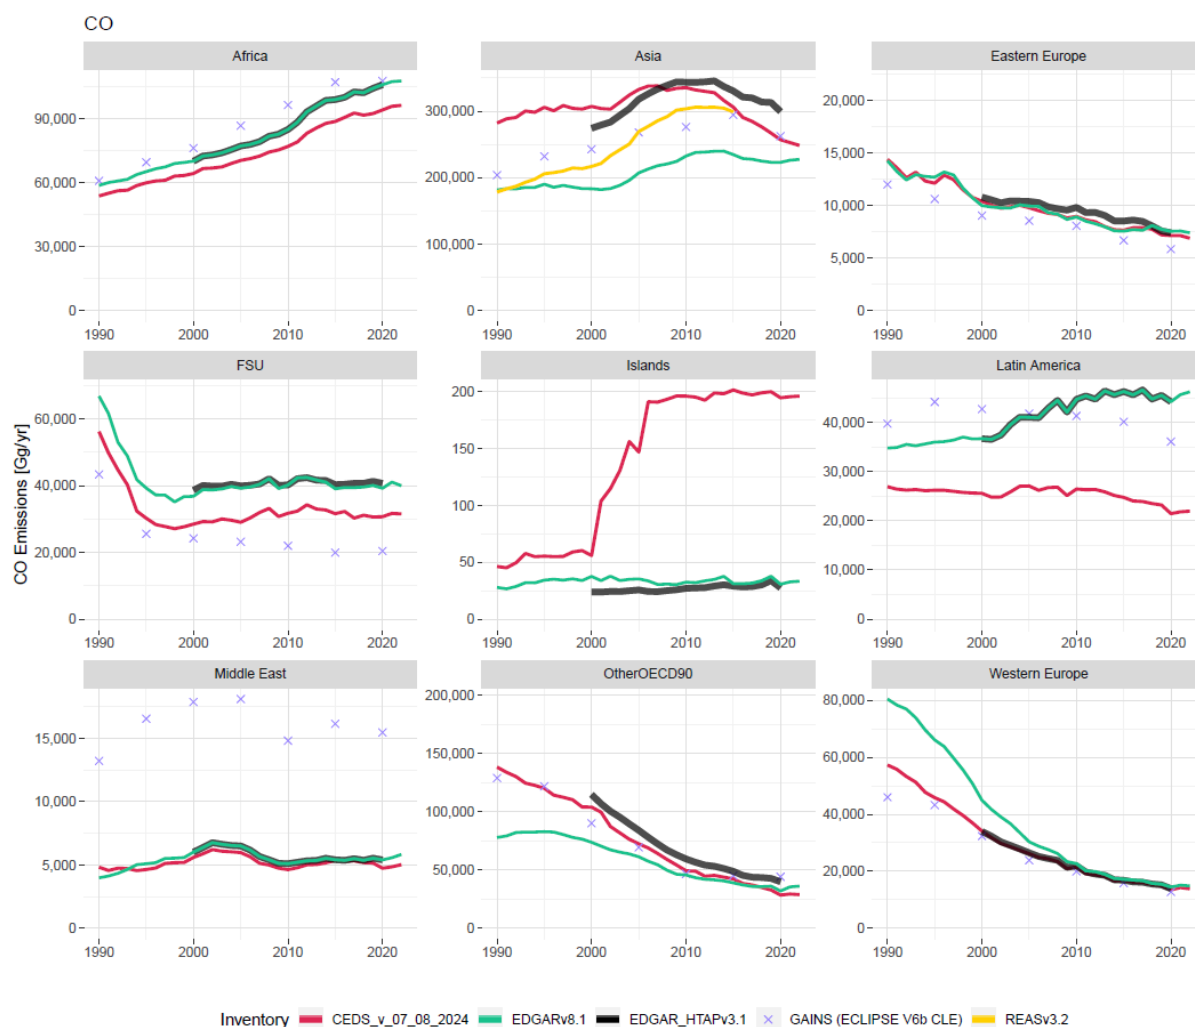

**Figure S3 – CO emission time series comparison by world region as provided by different inventories and HTAP\_v3.1.**

## S2.4- Comparison of NMVOC emissions

While HTAP\_v3.1 compares well with the country level data for NMVOC, there is a large variation overall between the different global inventories. HTAP\_v3.1 NMVOC emissions are shifted higher than the country level inventories used in CEDS for a number of countries/regions. The reason for this difference is not clear, but may be due to more recent country data used in EDGAR-HTAP\_v3.1 or differences in sectoral coverage.

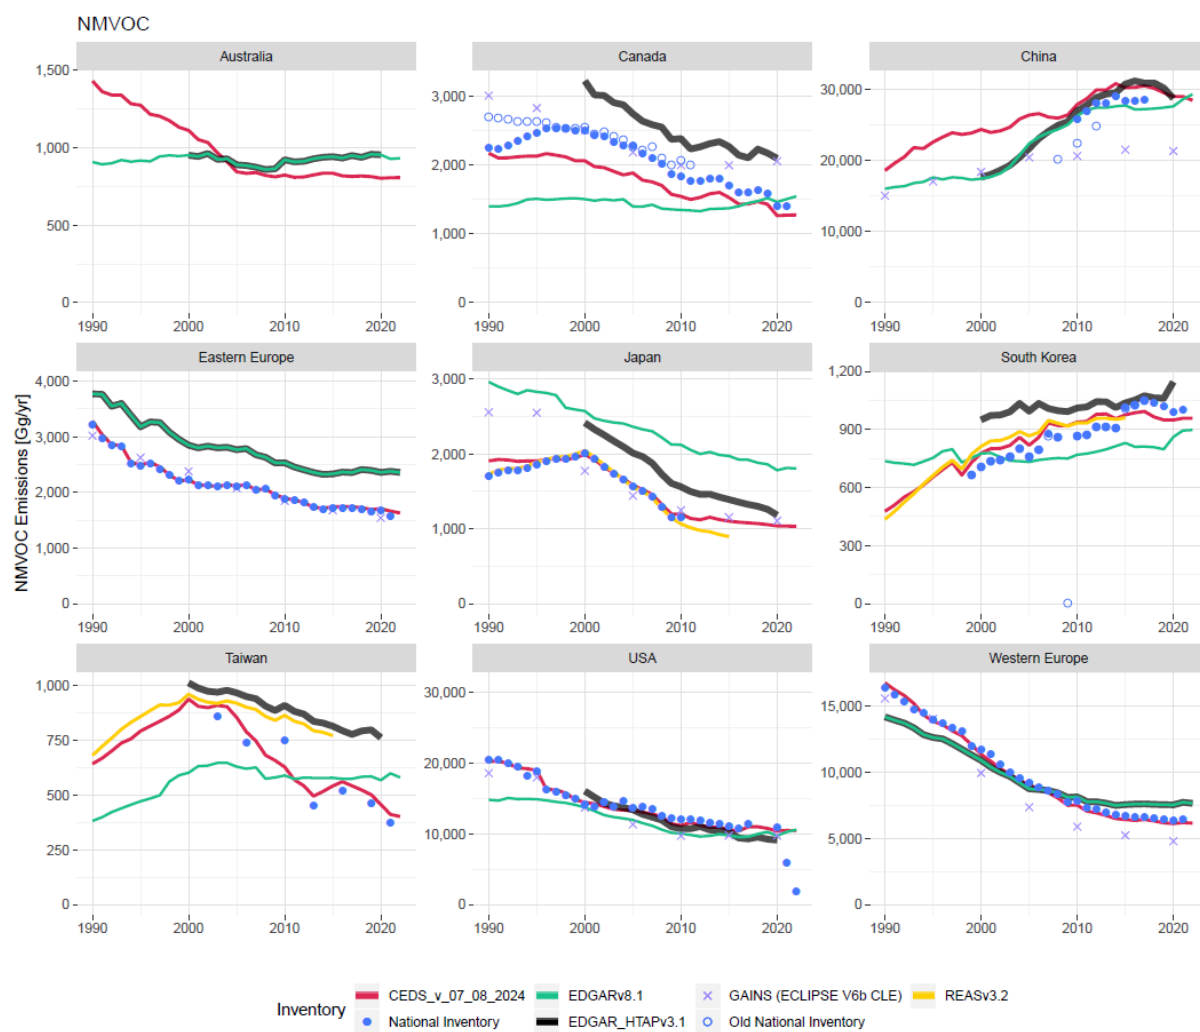

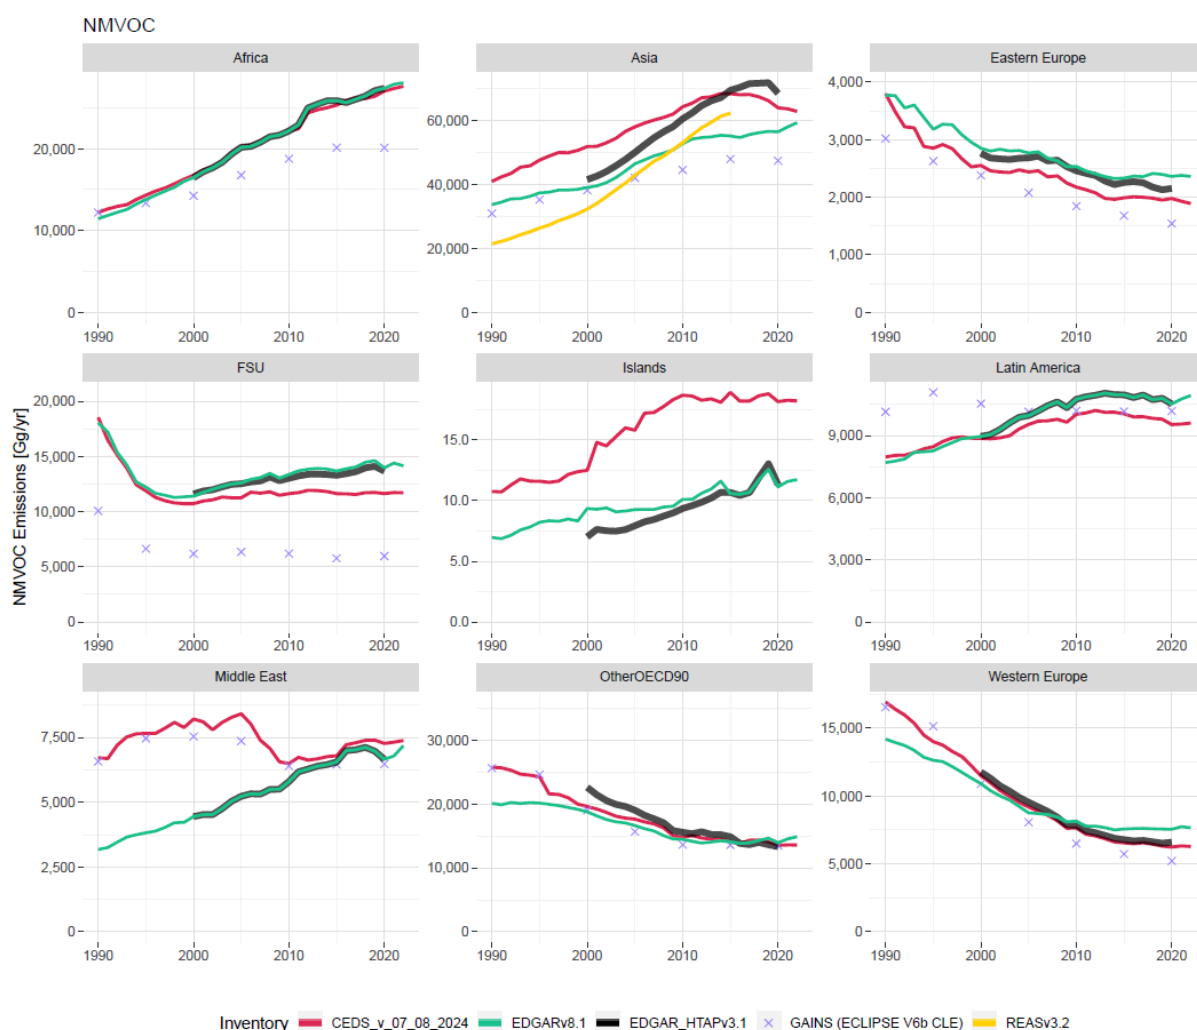

**Figure S4 – NMVOC emission time series comparison by world region as provided by different inventories and HTAP\_v3.1.**

### S2.5- Comparison of NH<sub>3</sub> emissions

While HTAP\_v3.1 compares well with the country level data for NH<sub>3</sub> in most cases, there is also a large variation overall between the different global inventories. In some cases, such as the USA, gridded NH<sub>3</sub> emissions in some key agricultural sectors was not available so these emissions were gridded filled from EDGAR estimates.

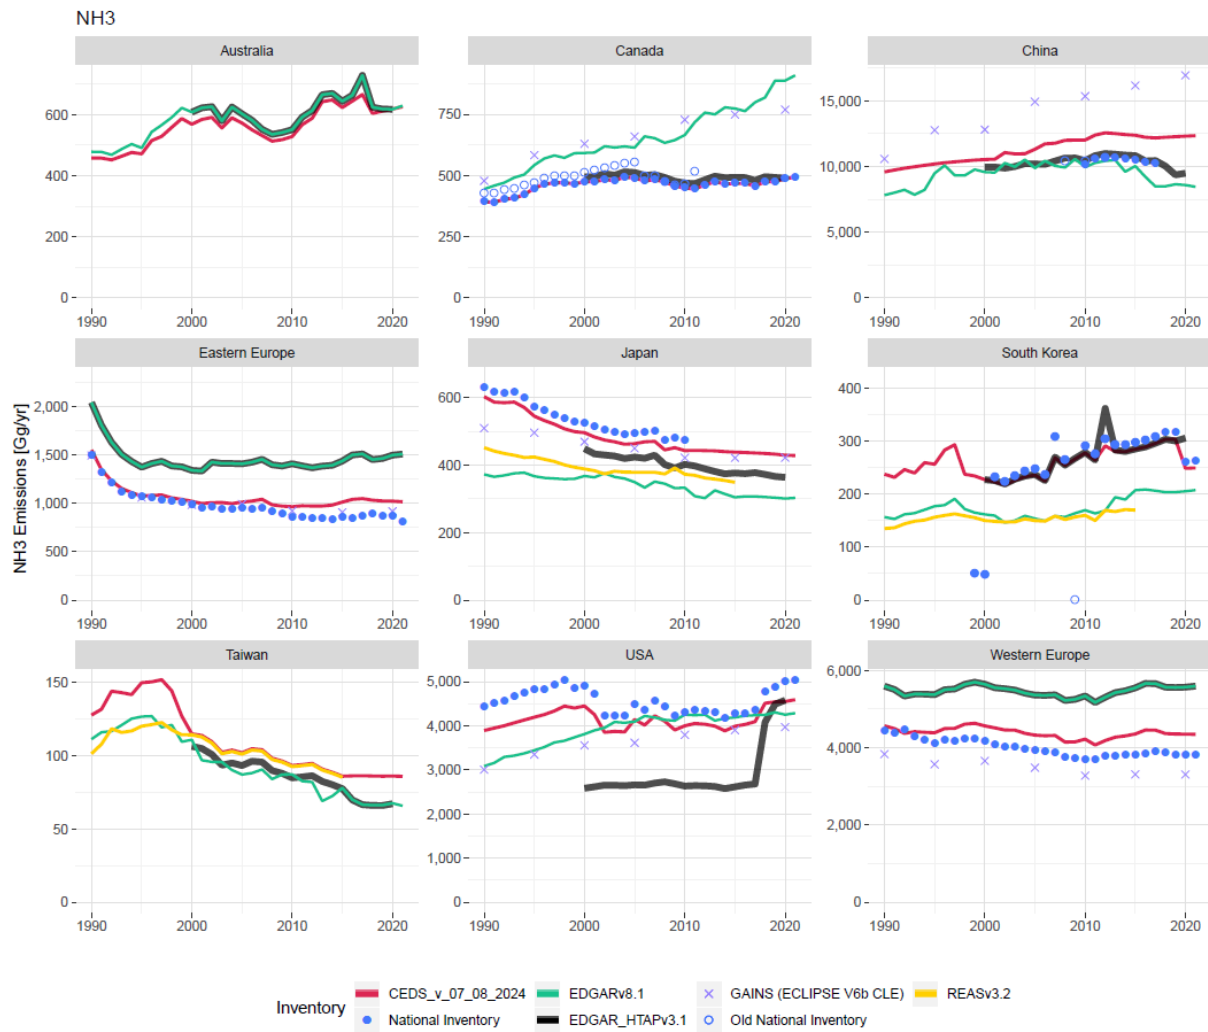

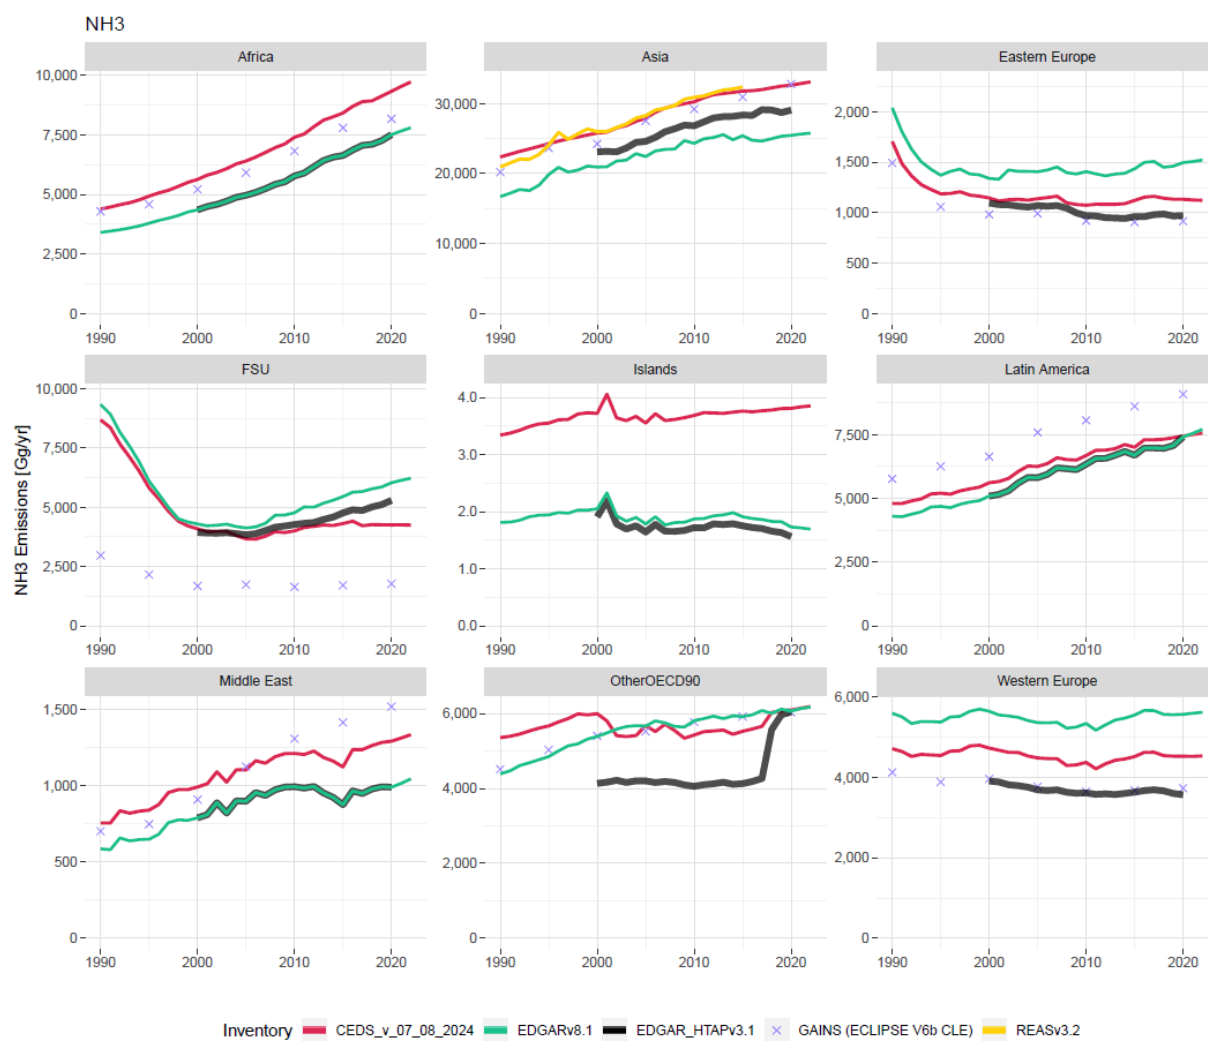

**Figure S5 – NH<sub>3</sub> emission time series comparison by world region as provided by different inventories and HTAP\_v3.1.**

### S3 – Monthly variability of the emissions

Figures S6, S7 and S8 show the monthly contribution of the emissions of CO, NMVOC and SO<sub>2</sub> in 2015 for world regions. The largest variability is found for the residential sector and agriculture, while smaller variation is present for energy, industry and transport.

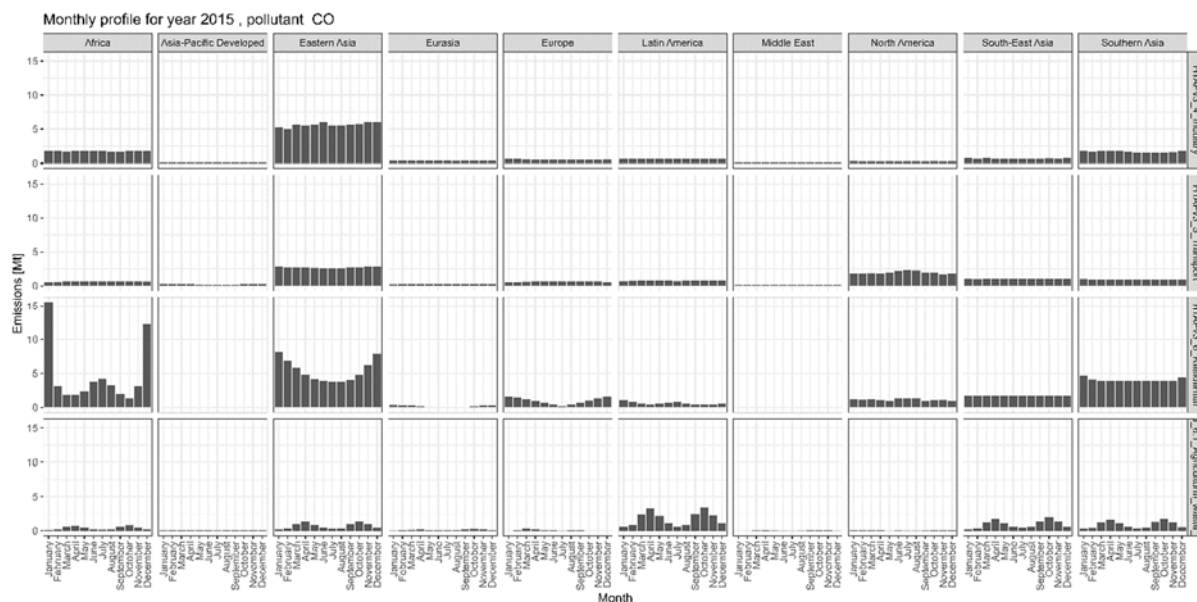

**Figure S6 – Monthly variability of CO emissions for relevant emission sectors for the different world regions in 2015.**

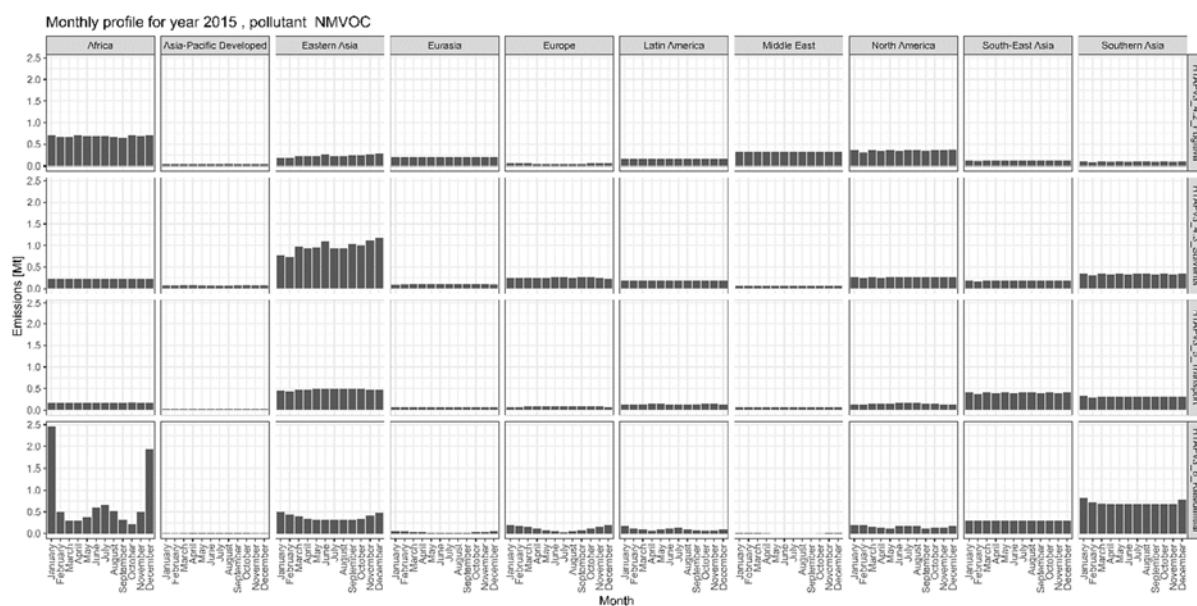

**Figure S7 – Monthly variability of NMVOC emissions for relevant emission sectors for the different world regions in 2015.**

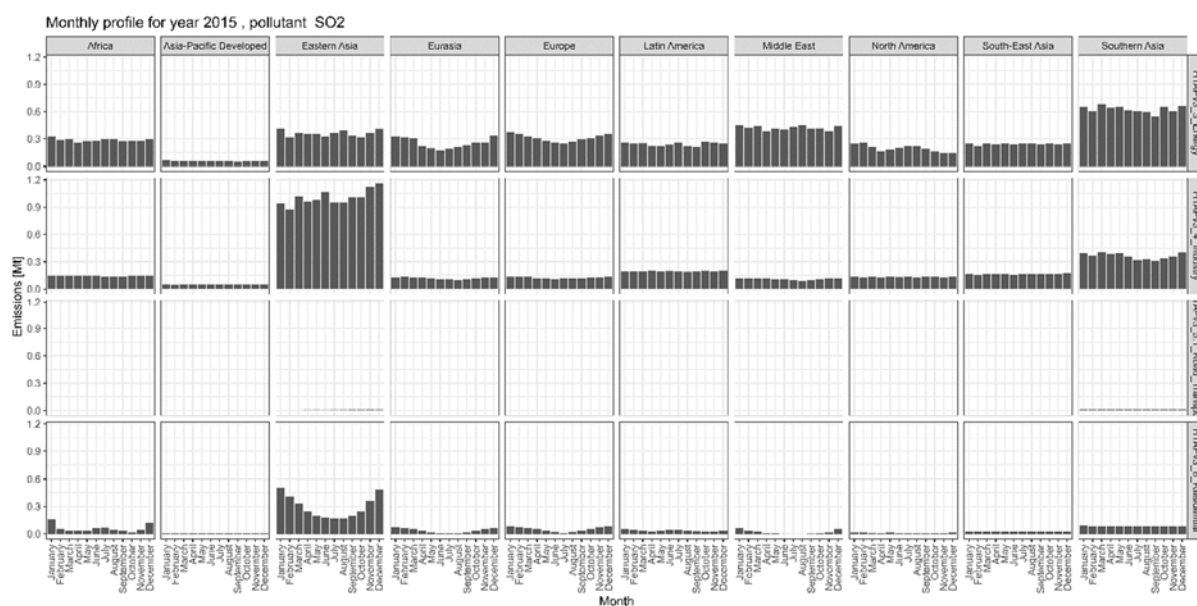

**Figure S8 – Monthly variability of SO<sub>2</sub> emissions for relevant emission sectors for the different world regions in 2015.**

Figures S9-S14 show the monthly mean profiles for the different pollutants and relevant emission sectors. The mean profile over the years 2002-2015, which is the period covered by all data providers, for each region is represented together with the 10<sup>th</sup> and 90<sup>th</sup> percentiles. With the exception of few data providers (EDGAR and ECCC), no inter-annual variability of the monthly profiles is found.

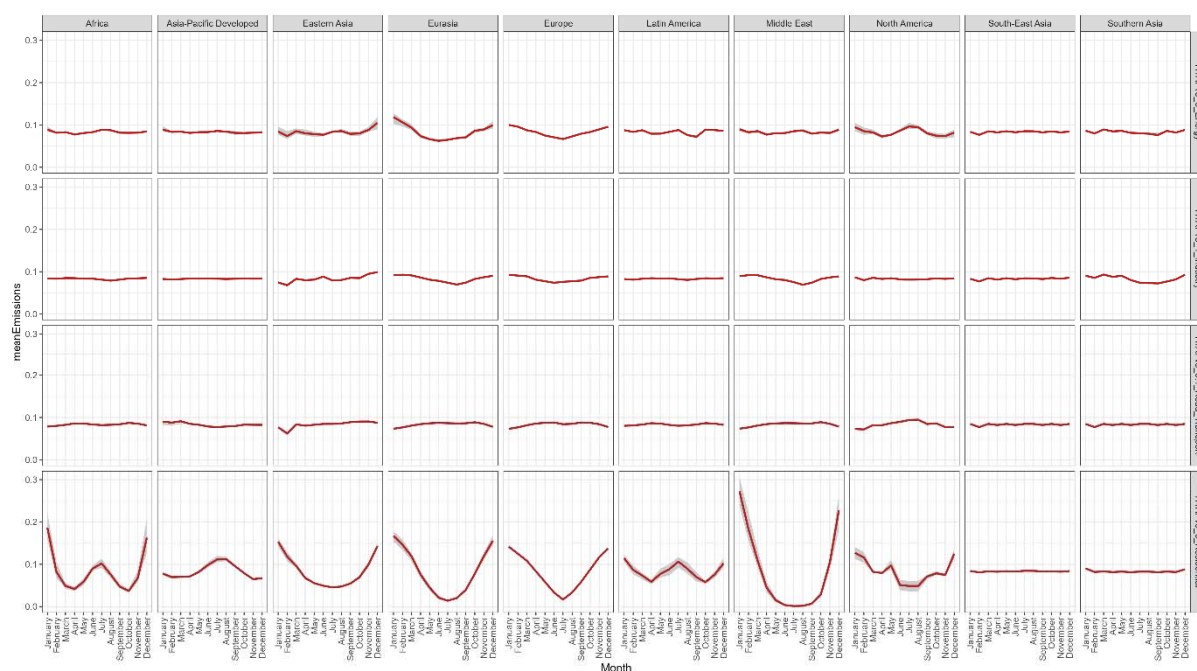

**Figure S9 – Monthly mean profile of SO<sub>2</sub> emissions for relevant emission sectors for the different world regions. The mean profile over the years 2002-2015, which is the period covered by all data providers, for each region is represented together with the 10<sup>th</sup> and 90<sup>th</sup> percentiles, in grey.**

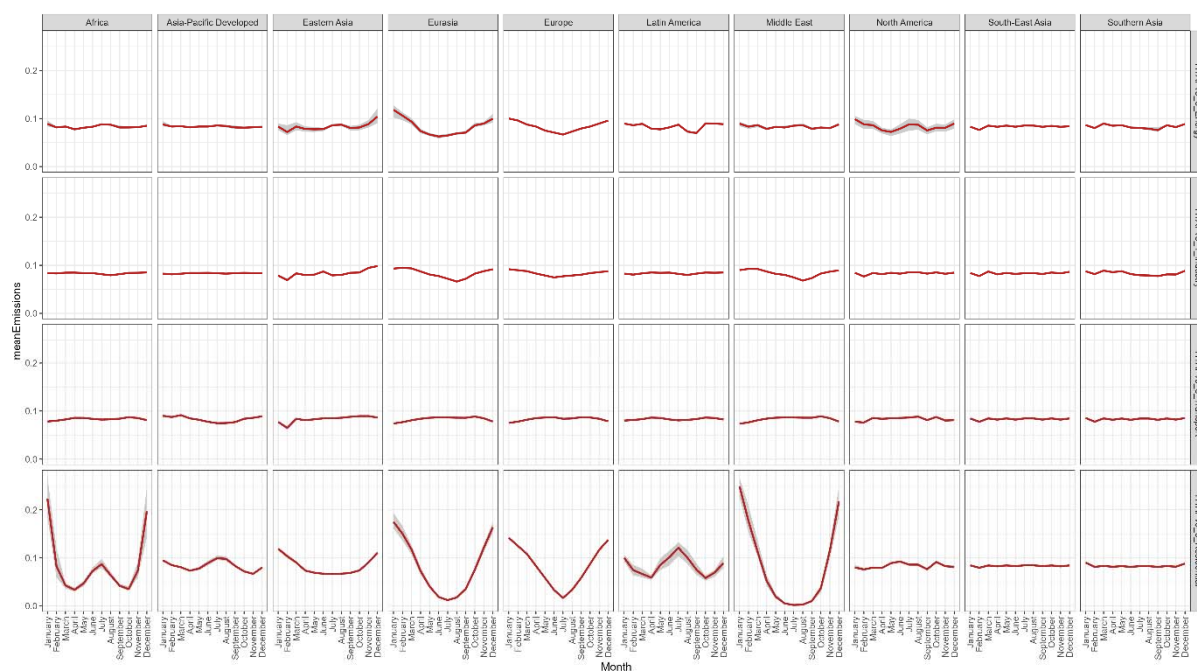

**Figure S10 – Monthly mean profile of NOx emissions for relevant emission sectors for the different world regions. The mean profile over the years 2002-2015, which is the period covered by all data providers, for each region is represented together with the 10° and 90° percentiles.**

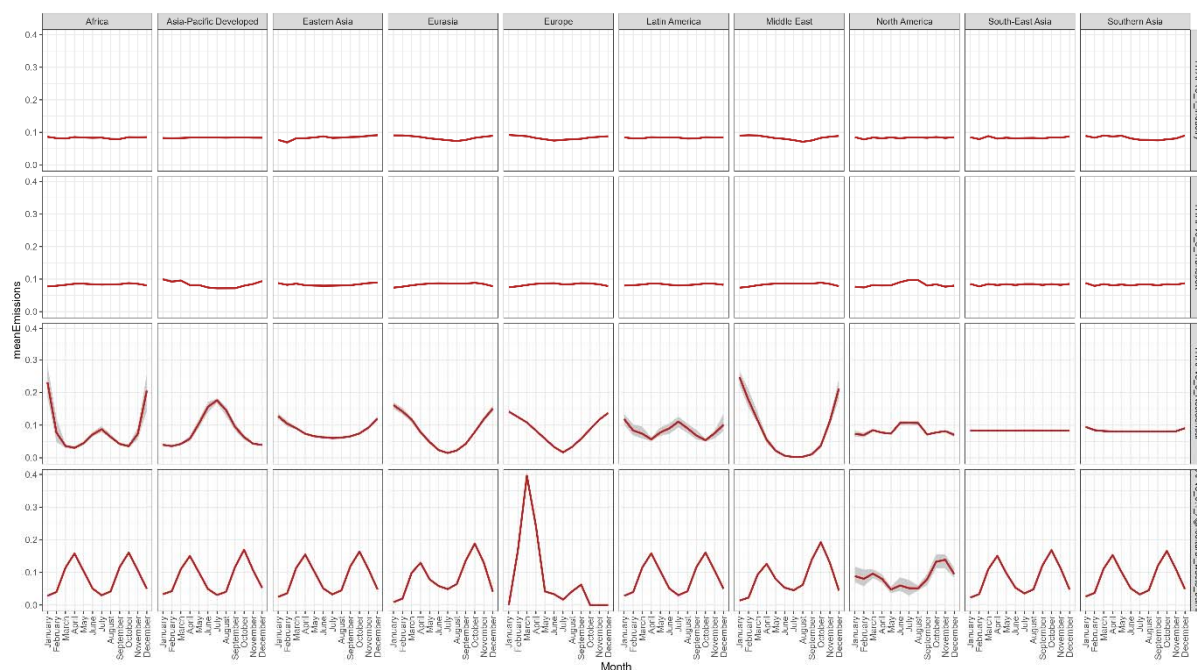

**Figure S11 – Monthly mean profile of CO emissions for relevant emission sectors for the different world regions. The mean profile over the years 2002-2015, which is the period covered by all data providers, for each region is represented together with the 10° and 90° percentiles.**



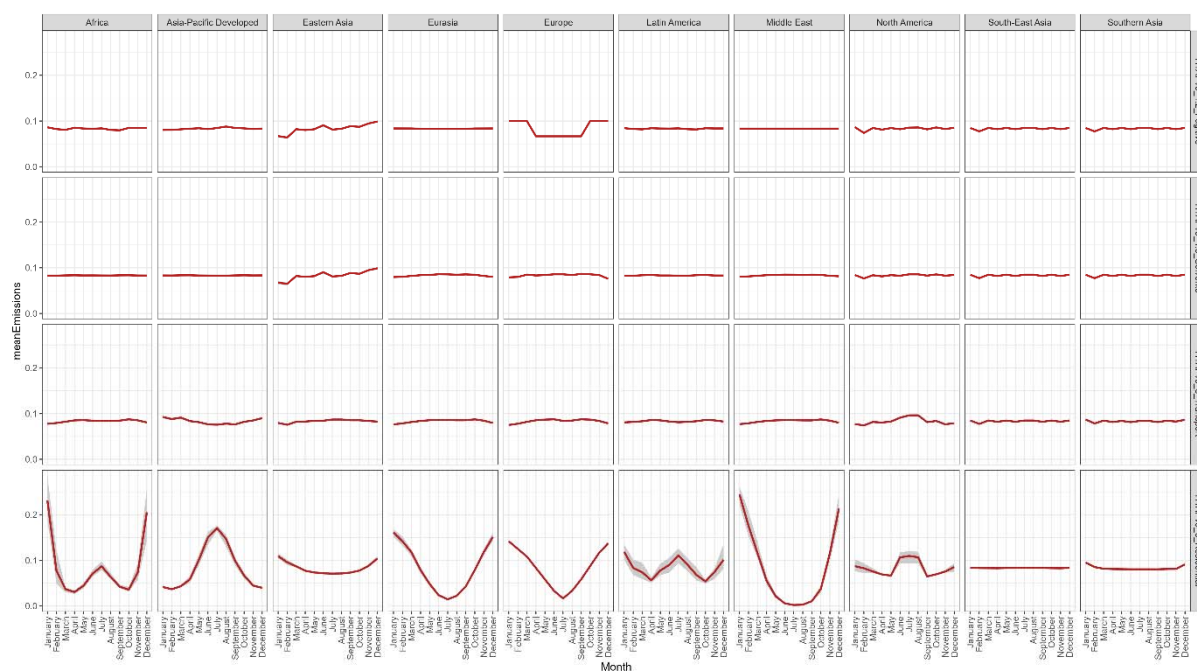

**Figure S12 – Monthly mean profile of NMVOC emissions for relevant emission sectors for the different world regions. The mean profile over the years 2002-2015, which is the period covered by all data providers, for each region is represented together with the 10° and 90° percentiles.**

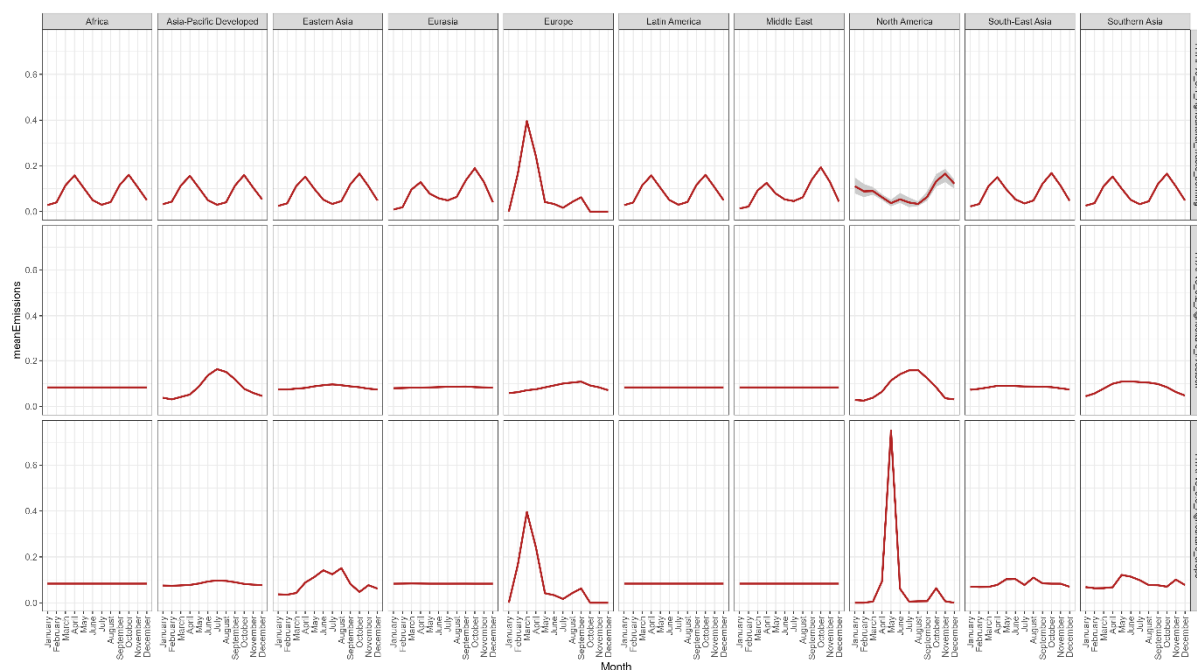

**Figure S13 – Monthly mean profile of NH<sub>3</sub> emissions for relevant emission sectors for the different world regions. The mean profile over the years 2002-2015, which is the period covered by all data providers, for each region is represented together with the 10° and 90° percentiles.**

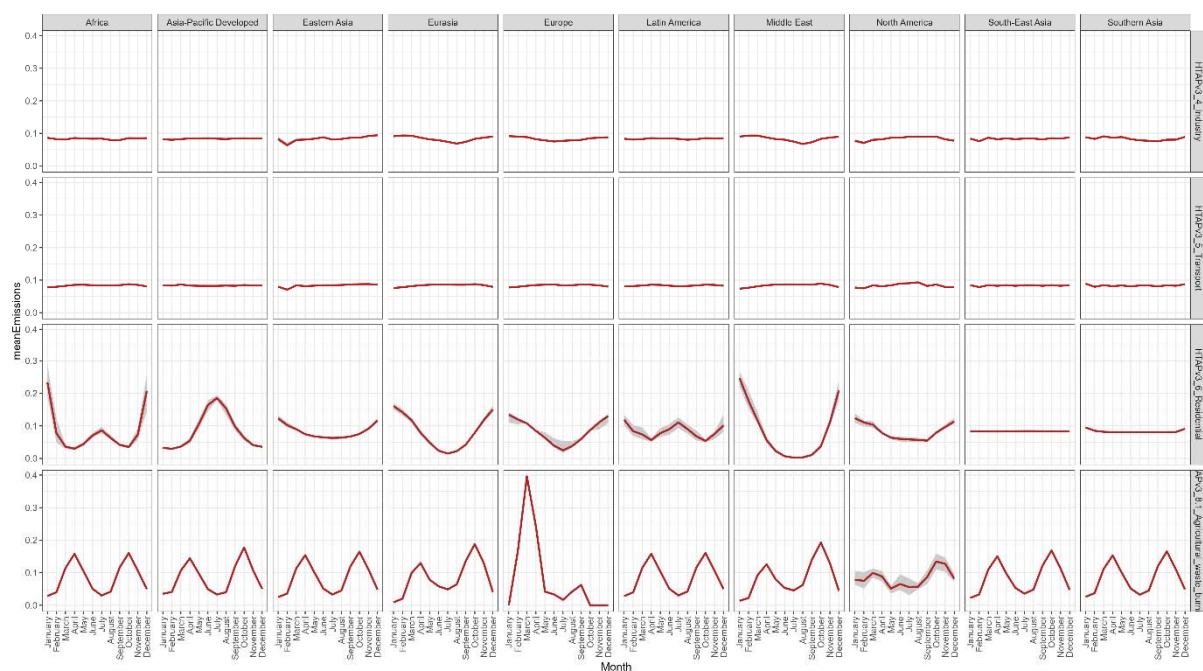

**Figure S14 – Monthly mean profile of PM<sub>10</sub> emissions for relevant emission sectors for the different world regions. The mean profile over the years 2002-2015, which is the period covered by all data providers, for each region is represented together with the 10° and 90° percentiles.**

## S4 NMVOC speciation

Table S2 provides the list of Global Emissions Initiative (GEIA) 25 NMVOC groups included in HTAP\_v3.1 with the corresponding molecular formula.

**Table S3 – List of NMVOC species included in HTAP\_v3.1. R and R' denote functional groups. Where general formulae are not appropriate, the simplest molecular formula representing the group is provided. NA = not available**

| GEIA ID | GEIA group                            | Molecular formula            |
|---------|---------------------------------------|------------------------------|
| voc1    | Alkanols (alcohols)                   | $C_nH_{2n+1}OH$              |
| voc2    | Ethane                                | $C_2H_6$                     |
| voc3    | Propane                               | $C_3H_8$                     |
| voc4    | Butanes                               | $C_4H_{10}$                  |
| voc5    | Pentanes                              | $C_5H_{12}$                  |
| voc6    | Hexanes and higher alkanes            | $C_nH_{2n+2}$ ( $n \geq 6$ ) |
| voc7    | Ethene (ethylene)                     | $C_2H_4$                     |
| voc8    | Propene                               | $C_3H_6$                     |
| voc9    | Ethyne (acetylene)                    | $C_2H_2$                     |
| voc10   | Isoprenes                             | $C_5H_8$                     |
| voc11   | Monoterpenes                          | $C_{10}H_{16}$               |
| voc12   | Other alk(adi)enes/alkynes (olefines) | $C_nH_{2n-2}$                |
| voc13   | Benzene (benzol)                      | $C_6H_6$                     |
| voc14   | Methylbenzene (toluene)               | $C_7H_8$                     |
| voc15   | Dimethylbenzenes (xylenes)            | $C_6H_4(CH_3)_2$             |
| voc16   | Trimethylbenzenes                     | $C_6H_3(CH_3)_3$             |
| voc17   | Other aromatics                       | $C_nH_{2n-6}$                |
| voc18   | Esters                                | $R-C(=O)O-R'$                |
| voc19   | Ethers (alkoxy alkanes)               | $R-O-R'$                     |
| voc20   | Chlorinated hydrocarbons              | $CH_3Cl$                     |
| voc21   | Methanal (formaldehyde)               | $CH_2O$                      |
| voc22   | Other alkanals (aldehydes)            | $R-CHO$                      |
| voc23   | Alkanones (ketones)                   | $R-C(=O)-R'$                 |
| voc24   | Acids (alkanoic)                      | $R-C_nH_nCOOH$               |
| voc25   | Other NMVOC (HCFCs, nitriles, etc.)   | NA                           |

**Table S4 - Regional mapping to be applied for NMVOC speciation**

| <b>Country code</b> | <b>Country name</b>         | <b>Regional VOC grouping</b> | <b>Region definition</b> |
|---------------------|-----------------------------|------------------------------|--------------------------|
| ABW                 | Aruba                       | OT                           | Other                    |
| AFG                 | Afghanistan                 | AS                           | Asia                     |
| AGO                 | Angola                      | OT                           | Other                    |
| AIA                 | Anguilla                    | OT                           | Other                    |
| AIR                 | Int. Aviation               | OT                           | Other                    |
| ALA                 | Åland Islands               | EU                           | Europe                   |
| ALB                 | Albania                     | EU                           | Europe                   |
| AND                 | Andorra                     | EU                           | Europe                   |
| ANT                 | Netherlands Antilles        | OT                           | Other                    |
| ARE                 | United Arab Emirates        | OT                           | Other                    |
| ARG                 | Argentina                   | OT                           | Other                    |
| ARM                 | Armenia                     | EU                           | Europe                   |
| ASM                 | American Samoa              | OT                           | Other                    |
| ATA                 | Antarctica                  | OT                           | Other                    |
| ATF                 | French Southern Territories | OT                           | Other                    |
| ATG                 | Antigua and Barbuda         | OT                           | Other                    |
| AUS                 | Australia                   | OT                           | Other                    |
| AUT                 | Austria                     | EU                           | Europe                   |
| AZE                 | Azerbaijan                  | EU                           | Europe                   |
| BDI                 | Burundi                     | OT                           | Other                    |
| BEL                 | Belgium                     | EU                           | Europe                   |
| BEN                 | Benin                       | OT                           | Other                    |
| BFA                 | Burkina Faso                | OT                           | Other                    |
| BGD                 | Bangladesh                  | AS                           | Asia                     |
| BGR                 | Bulgaria                    | EU                           | Europe                   |
| BHR                 | Bahrain                     | OT                           | Other                    |
| BHS                 | Bahamas                     | OT                           | Other                    |
| BIH                 | Bosnia and Herzegovina      | EU                           | Europe                   |
| BLR                 | Belarus                     | EU                           | Europe                   |
| BLZ                 | Belize                      | OT                           | Other                    |
| BMU                 | Bermuda                     | OT                           | Other                    |
| BOL                 | Bolivia                     | OT                           | Other                    |
| BRA                 | Brazil                      | OT                           | Other                    |
| BRB                 | Barbados                    | OT                           | Other                    |
| BRN                 | Brunei Darussalam           | AS                           | Asia                     |
| BTN                 | Bhutan                      | AS                           | Asia                     |
| BVT                 | Bouvet Island               | OT                           | Other                    |
| BWA                 | Botswana                    | OT                           | Other                    |
| CAF                 | Central African Republic    | OT                           | Other                    |
| CAN                 | Canada                      | NA                           | North America            |
| CCK                 | Cocos (Keeling) Islands     | OT                           | Other                    |
| CHE                 | Switzerland                 | EU                           | Europe                   |
| CHL                 | Chile                       | OT                           | Other                    |

|     |                                       |    |        |
|-----|---------------------------------------|----|--------|
| CHN | China                                 | AS | Asia   |
| CIV | Cote d'Ivoire                         | OT | Other  |
| CMR | Cameroon                              | OT | Other  |
| COD | Congo, the Democratic Republic of the | OT | Other  |
| COG | Congo                                 | OT | Other  |
| COK | Cook Islands                          | OT | Other  |
| COL | Colombia                              | OT | Other  |
| COM | Comoros                               | OT | Other  |
| CPV | Cape Verde                            | OT | Other  |
| CRI | Costa Rica                            | OT | Other  |
| CUB | Cuba                                  | OT | Other  |
| CXR | Christmas Island                      | OT | Other  |
| CYM | Cayman Islands                        | OT | Other  |
| CYP | Cyprus                                | EU | Europe |
| CZE | Czech Republic                        | EU | Europe |
| DEU | Germany                               | EU | Europe |
| DJI | Djibouti                              | OT | Other  |
| DMA | Dominica                              | OT | Other  |
| DNK | Denmark                               | EU | Europe |
| DOM | Dominican Republic                    | OT | Other  |
| DZA | Algeria                               | OT | Other  |
| E27 | Europe - 27 MS                        | EU | Europe |
| ECU | Ecuador                               | OT | Other  |
| EGY | Egypt                                 | OT | Other  |
| ERI | Eritrea                               | OT | Other  |
| ESH | Western Sahara                        | OT | Other  |
| ESP | Spain                                 | EU | Europe |
| EST | Estonia                               | EU | Europe |
| ETH | Ethiopia                              | OT | Other  |
| FIN | Finland                               | EU | Europe |
| FJI | Fiji                                  | OT | Other  |
| FLK | Falkland Islands (Malvinas)           | OT | Other  |
| FRA | France                                | EU | Europe |
| FRO | Faroe Islands                         | EU | Europe |
| FSM | Micronesia, Federated States of       | OT | Other  |
| GAB | Gabon                                 | OT | Other  |
| GBR | United Kingdom                        | EU | Europe |
| GEO | Georgia                               | EU | Europe |
| GGY | Guernsey                              | EU | Europe |
| GHA | Ghana                                 | OT | Other  |
| GIB | Gibraltar                             | EU | Europe |
| GIN | Guinea                                | OT | Other  |
| GLP | Guadeloupe                            | OT | Other  |
| GMB | Gambia                                | OT | Other  |
| GNB | Guinea-Bissau                         | OT | Other  |
| GNQ | Equatorial Guinea                     | OT | Other  |

|     |                                   |    |        |
|-----|-----------------------------------|----|--------|
| GRC | Greece                            | EU | Europe |
| GRD | Grenada                           | OT | Other  |
| GRL | Greenland                         | EU | Europe |
| GTM | Guatemala                         | OT | Other  |
| GUF | French Guiana                     | OT | Other  |
| GUM | Guam                              | OT | Other  |
| GUY | Guyana                            | OT | Other  |
| HKG | Hong Kong                         | AS | Asia   |
| HMD | Heard Island and McDonald Islands | OT | Other  |
| HND | Honduras                          | OT | Other  |
| HRV | Croatia                           | EU | Europe |
| HTI | Haiti                             | OT | Other  |
| HUN | Hungary                           | EU | Europe |
| IDN | Indonesia                         | AS | Asia   |
| IMN | Isle of Man                       | EU | Europe |
| IND | India                             | AS | Asia   |
| IOT | British Indian Ocean Territory    | AS | Asia   |
| IRL | Ireland                           | EU | Europe |
| IRN | Iran, Islamic Republic of         | OT | Other  |
| IRQ | Iraq                              | OT | Other  |
| ISL | Iceland                           | EU | Europe |
| ISR | Israel                            | OT | Other  |
| ITA | Italy                             | EU | Europe |
| JAM | Jamaica                           | OT | Other  |
| JEY | Jersey                            | EU | Europe |
| JOR | Jordan                            | OT | Other  |
| JPN | Japan                             | AS | Asia   |
| KAZ | Kazakhstan                        | AS | Asia   |
| KEN | Kenya                             | OT | Other  |
| KGZ | Kyrgyzstan                        | AS | Asia   |
| KHM | Cambodia                          | AS | Asia   |
| KIR | Kiribati                          | OT | Other  |
| KNA | Saint Kitts and Nevis             | OT | Other  |
| KOR | Korea, Republic of                | AS | Asia   |
| KWT | Kuwait                            | OT | Other  |
| LAO | Lao People's Democratic Republic  | AS | Asia   |
| LBN | Lebanon                           | OT | Other  |
| LBR | Liberia                           | OT | Other  |
| LBY | Libyan Arab Jamahiriya            | OT | Other  |
| LCA | Saint Lucia                       | OT | Other  |
| LIE | Liechtenstein                     | EU | Europe |
| LKA | Sri Lanka                         | AS | Asia   |
| LSO | Lesotho                           | OT | Other  |
| LTU | Lithuania                         | EU | Europe |
| LUX | Luxembourg                        | EU | Europe |
| LVA | Latvia                            | EU | Europe |

|     |                                            |    |        |
|-----|--------------------------------------------|----|--------|
| MAC | Macao                                      | AS | Asia   |
| MAR | Morocco                                    | OT | Other  |
| MCO | Monaco                                     | EU | Europe |
| MDA | Moldova, Republic of                       | EU | Europe |
| MDG | Madagascar                                 | OT | Other  |
| MDV | Maldives                                   | AS | Asia   |
| MEX | Mexico                                     | OT | Other  |
| MHL | Marshall Islands                           | OT | Other  |
| MKD | Macedonia, the former Yugoslav Republic of | EU | Europe |
| MLI | Mali                                       | OT | Other  |
| MLT | Malta                                      | EU | Europe |
| MMR | Myanmar                                    | AS | Asia   |
| MNE | Montenegro                                 | EU | Europe |
| MNG | Mongolia                                   | AS | Asia   |
| MNP | Northern Mariana Islands                   | OT | Other  |
| MOZ | Mozambique                                 | OT | Other  |
| MRT | Mauritania                                 | OT | Other  |
| MSR | Montserrat                                 | OT | Other  |
| MTQ | Martinique                                 | OT | Other  |
| MUS | Mauritius                                  | OT | Other  |
| MWI | Malawi                                     | OT | Other  |
| MYS | Malaysia                                   | AS | Asia   |
| MYT | Mayotte                                    | OT | Other  |
| NAM | Namibia                                    | OT | Other  |
| NCL | New Caledonia                              | OT | Other  |
| NER | Niger                                      | OT | Other  |
| NFK | Norfolk Island                             | OT | Other  |
| NGA | Nigeria                                    | OT | Other  |
| NIC | Nicaragua                                  | OT | Other  |
| NIU | Niue                                       | OT | Other  |
| NLD | Netherlands                                | EU | Europe |
| NOR | Norway                                     | EU | Europe |
| NPL | Nepal                                      | AS | Asia   |
| NRU | Nauru                                      | OT | Other  |
| NZL | New Zealand                                | OT | Other  |
| OMN | Oman                                       | OT | Other  |
| PAK | Pakistan                                   | AS | Asia   |
| PAN | Panama                                     | OT | Other  |
| PCN | Pitcairn                                   | OT | Other  |
| PER | Peru                                       | OT | Other  |
| PHL | Philippines                                | AS | Asia   |
| PLW | Palau                                      | OT | Other  |
| PNG | Papua New Guinea                           | AS | Asia   |
| POL | Poland                                     | EU | Europe |
| PRI | Puerto Rico                                | OT | Other  |

|     |                                              |    |               |
|-----|----------------------------------------------|----|---------------|
| PRK | Korea, Democratic People's Republic of       | AS | Asia          |
| PRT | Portugal                                     | EU | Europe        |
| PRY | Paraguay                                     | OT | Other         |
| PSE | Palestinian Territory                        | OT | Other         |
| PYF | French Polynesia                             | OT | Other         |
| QAT | Qatar                                        | OT | Other         |
| REU | Reunion                                      | OT | Other         |
| ROU | Romania                                      | EU | Europe        |
| RUS | Russian Federation                           | EU | Europe        |
| RWA | Rwanda                                       | OT | Other         |
| SAU | Saudi Arabia                                 | OT | Other         |
| SCG | Serbia and Montenegro                        | EU | Europe        |
| SDN | Sudan                                        | OT | Other         |
| SEA | Int. Shipping                                | OT | Other         |
| SEN | Senegal                                      | OT | Other         |
| SGP | Singapore                                    | AS | Asia          |
| SGS | South Georgia and the South Sandwich Islands | OT | Other         |
| SHN | Saint Helena                                 | OT | Other         |
| SJM | Svalbard and Jan Mayen                       | EU | Europe        |
| SLB | Solomon Islands                              | OT | Other         |
| SLE | Sierra Leone                                 | OT | Other         |
| SLV | El Salvador                                  | OT | Other         |
| SMR | San Marino                                   | EU | Europe        |
| SOM | Somalia                                      | OT | Other         |
| SPM | Saint Pierre and Miquelon                    | NA | North America |
| SRB | Serbia                                       | EU | Europe        |
| STP | Sao Tome and Principe                        | OT | Other         |
| SUR | Suriname                                     | OT | Other         |
| SVK | Slovakia                                     | EU | Europe        |
| SVN | Slovenia                                     | EU | Europe        |
| SWE | Sweden                                       | EU | Europe        |
| SWZ | Swaziland                                    | OT | Other         |
| SYC | Seychelles                                   | OT | Other         |
| SYR | Syrian Arab Republic                         | OT | Other         |
| TCA | Turks and Caicos Islands                     | OT | Other         |
| TCD | Chad                                         | OT | Other         |
| TGO | Togo                                         | OT | Other         |
| THA | Thailand                                     | AS | Asia          |
| TJK | Tajikistan                                   | AS | Asia          |
| TKL | Tokelau                                      | OT | Other         |
| TKM | Turkmenistan                                 | AS | Asia          |
| TLS | Timor-Leste                                  | AS | Asia          |
| TON | Tonga                                        | OT | Other         |
| TTO | Trinidad and Tobago                          | OT | Other         |
| TUN | Tunisia                                      | OT | Other         |



|     |                                      |    |               |
|-----|--------------------------------------|----|---------------|
| TUR | Turkey                               | EU | Europe        |
| TUV | Tuvalu                               | OT | Other         |
| TWN | Taiwan, Province of China            | AS | Asia          |
| TZA | Tanzania, United Republic of         | OT | Other         |
| UGA | Uganda                               | OT | Other         |
| UKR | Ukraine                              | EU | Europe        |
| UMI | United States Minor Outlying Islands | NA | North America |
| URY | Uruguay                              | OT | Other         |
| USA | United States                        | NA | North America |
| UZB | Uzbekistan                           | AS | Asia          |
| VAT | Holy See (Vatican City State)        | EU | Europe        |
| VCT | Saint Vincent and the Grenadines     | OT | Other         |
| VEN | Venezuela                            | OT | Other         |
| VGB | Virgin Islands, British              | OT | Other         |
| VIR | Virgin Islands, USA                  | OT | Other         |
| VNM | Viet Nam                             | AS | Asia          |
| VUT | Vanuatu                              | OT | Other         |
| WLF | Wallis and Futuna                    | OT | Other         |
| WSM | Samoa                                | OT | Other         |
| YEM | Yemen                                | OT | Other         |
| ZAF | South Africa                         | OT | Other         |
| ZMB | Zambia                               | OT | Other         |
| ZWE | Zimbabwe                             | OT | Other         |

## S5 Qualitative uncertainty estimates of global emissions

A qualitative indication of the emission variability at global level is reported in Table S5 and it is calculated as the relative difference between EDGARv8 and HTAP\_v3.1 emissions by sector and pollutant. Further explanations are provided in section 3.5.2 of the manuscript.

**Table S5 – Variability of global emission estimates by sector and pollutant, calculated as the relative difference between HTAP\_v3.1 emissions and the EDGARv8 estimates. Variability ranges are based on the qualitative classes defined in the EMEP/EEA Guidebook 2019 as low (L), low medium (LM), upper medium (UM), high (H).**

| Emission sector    | Substance         | Global variability, year 2000 | Global variability, year 2018 | Global variability, year 2020 | Variability range, year 2000 | Variability range, year 2018 | Variability range, year 2020 |
|--------------------|-------------------|-------------------------------|-------------------------------|-------------------------------|------------------------------|------------------------------|------------------------------|
| 3 Energy           | BC                | 3.9%                          | 42.9%                         | 52.6%                         | L                            | LM                           | UM                           |
| 3 Energy           | CO                | -1.9%                         | 77.8%                         | 9.8%                          | L                            | UM                           | L                            |
| 3 Energy           | NH <sub>3</sub>   | -0.3%                         | 44.5%                         | -44.0%                        | L                            | LM                           | LM                           |
| 3 Energy           | NMVOC             | 15.8%                         | 24.4%                         | 38.0%                         | LM                           | LM                           | LM                           |
| 3 Energy           | NO <sub>x</sub>   | 22.3%                         | 20.7%                         | 4.5%                          | LM                           | LM                           | L                            |
| 3 Energy           | OC                | 34.9%                         | 15.5%                         | 171.5%                        | LM                           | LM                           | H                            |
| 3 Energy           | PM <sub>10</sub>  | -16.4%                        | -1.2%                         | -48.6%                        | LM                           | L                            | LM                           |
| 3 Energy           | PM <sub>2.5</sub> | -17.2%                        | -2.7%                         | -4.4%                         | LM                           | L                            | L                            |
| 3 Energy           | SO <sub>2</sub>   | -1.9%                         | -39.5%                        | 18.1%                         | L                            | LM                           | LM                           |
| 4.1 Industry       | BC                | 59.3%                         | 96.4%                         | 42.4%                         | UM                           | UM                           | LM                           |
| 4.1 Industry       | CO                | -15.8%                        | 85.5%                         | 10.5%                         | LM                           | UM                           | L                            |
| 4.1 Industry       | NH <sub>3</sub>   | -24.0%                        | 50.3%                         | -35.1%                        | LM                           | UM                           | LM                           |
| 4.1 Industry       | NMVOC             | -3.7%                         | 47.8%                         | 48.9%                         | L                            | LM                           | LM                           |
| 4.1 Industry       | NO <sub>x</sub>   | -46.6%                        | 40.2%                         | 9.8%                          | LM                           | LM                           | L                            |
| 4.1 Industry       | OC                | -1.6%                         | 21.5%                         | 23.7%                         | L                            | LM                           | LM                           |
| 4.1 Industry       | PM <sub>10</sub>  | -60.3%                        | -0.5%                         | 5.3%                          | UM                           | L                            | L                            |
| 4.1 Industry       | PM <sub>2.5</sub> | -25.8%                        | -2.6%                         | 31.5%                         | LM                           | L                            | LM                           |
| 4.1 Industry       | SO <sub>2</sub>   | -53.7%                        | -54.2%                        | 85.1%                         | UM                           | UM                           | UM                           |
| 4.2 Fugitive       | BC                | 53.5%                         | 64.1%                         | 1.0%                          | UM                           | UM                           | L                            |
| 4.2 Fugitive       | CO                | 31.1%                         | 52.7%                         | 16.3%                         | LM                           | UM                           | LM                           |
| 4.2 Fugitive       | NH <sub>3</sub>   | 36.7%                         | 50.2%                         | 18.4%                         | LM                           | UM                           | LM                           |
| 4.2 Fugitive       | NMVOC             | 30.2%                         | 19.4%                         | 19.8%                         | LM                           | LM                           | LM                           |
| 4.2 Fugitive       | NO <sub>x</sub>   | 10.7%                         | 13.4%                         | -6.1%                         | L                            | L                            | L                            |
| 4.2 Fugitive       | OC                | 29.9%                         | 8.9%                          | -16.6%                        | LM                           | L                            | LM                           |
| 4.2 Fugitive       | PM <sub>10</sub>  | -0.6%                         | 0.9%                          | 10.9%                         | L                            | L                            | L                            |
| 4.2 Fugitive       | PM <sub>2.5</sub> | -29.0%                        | -23.0%                        | 3.6%                          | LM                           | LM                           | L                            |
| 4.2 Fugitive       | SO <sub>2</sub>   | -65.0%                        | -51.1%                        | -8.6%                         | UM                           | UM                           | L                            |
| 4.3 Solvents       | NH <sub>3</sub>   | 2.2%                          | -25.2%                        | -99.3%                        | L                            | LM                           | UM                           |
| 4.3 Solvents       | NMVOC             | -69.8%                        | -60.2%                        | -15.9%                        | UM                           | UM                           | LM                           |
| 4.3 Solvents       | PM <sub>10</sub>  | -74.5%                        | -67.6%                        | 26.0%                         | UM                           | UM                           | LM                           |
| 4.3 Solvents       | PM <sub>2.5</sub> | -99.8%                        | -99.6%                        | 37.6%                         | UM                           | UM                           | LM                           |
| 5.1 Road Transport | BC                | 52.3%                         | 80.2%                         | -48.5%                        | UM                           | UM                           | LM                           |
| 5.1 Road Transport | CO                | -4.2%                         | -16.4%                        | -46.2%                        | L                            | LM                           | LM                           |
| 5.1 Road Transport | NH <sub>3</sub>   | -21.3%                        | -47.0%                        | 93.8%                         | LM                           | LM                           | UM                           |

|                            |                   |        |        |        |    |    |    |
|----------------------------|-------------------|--------|--------|--------|----|----|----|
| 5.1 Road Transport         | NMVOC             | -36.2% | -51.1% | -52.6% | LM | UM | UM |
| 5.1 Road Transport         | NOx               | -11.0% | -58.1% | -11.9% | L  | UM | L  |
| 5.1 Road Transport         | OC                | -48.3% | -60.5% | -29.8% | LM | UM | LM |
| 5.1 Road Transport         | PM <sub>10</sub>  | -63.2% | -74.5% | -48.4% | UM | UM | LM |
| 5.1 Road Transport         | PM <sub>2.5</sub> | -53.1% | -81.2% | -47.5% | UM | UM | LM |
| 5.1 Road Transport         | SO <sub>2</sub>   | -90.3% | -93.8% | -73.1% | UM | UM | UM |
| 5.2 Brake_and_Tyre_wear    | BC                | 26.1%  | 19.1%  | 24.9%  | LM | LM | LM |
| 5.2 Brake_and_Tyre_wear    | OC                | -33.5% | -25.6% | -25.5% | LM | LM | LM |
| 5.2 Brake_and_Tyre_wear    | PM <sub>10</sub>  | -57.1% | -48.0% | -80.3% | UM | LM | UM |
| 5.2 Brake_and_Tyre_wear    | PM <sub>2.5</sub> | -84.9% | -80.0% | -49.8% | UM | UM | LM |
| 5.3 Domestic shipping      | BC                | 249.9% | 191.3% | 160.7% | H  | H  | H  |
| 5.3 Domestic shipping      | CO                | 221.2% | 188.7% | 355.7% | H  | H  | H  |
| 5.3 Domestic shipping      | NH <sub>3</sub>   | -5.5%  | 13.7%  | -15.1% | L  | L  | LM |
| 5.3 Domestic shipping      | NMVOC             | 11.4%  | 13.6%  | 274.6% | L  | L  | H  |
| 5.3 Domestic shipping      | NOx               | 11.1%  | 13.5%  | 97.2%  | L  | L  | UM |
| 5.3 Domestic shipping      | OC                | 5.2%   | 11.3%  | 138.9% | L  | L  | H  |
| 5.3 Domestic shipping      | PM <sub>10</sub>  | 6.3%   | 6.0%   | 204.7% | L  | L  | H  |
| 5.3 Domestic shipping      | PM <sub>2.5</sub> | -5.2%  | 3.3%   | 206.2% | L  | L  | H  |
| 5.3 Domestic shipping      | SO <sub>2</sub>   | -41.5% | -20.9% | 204.0% | LM | LM | H  |
| 5.4 Other_ground_transport | BC                | -34.5% | 8.9%   | -88.1% | LM | L  | UM |
| 5.4 Other_ground_transport | CO                | -13.8% | -17.4% | -85.2% | L  | LM | UM |
| 5.4 Other_ground_transport | NH <sub>3</sub>   | -55.5% | -33.1% | -2.2%  | UM | LM | L  |
| 5.4 Other_ground_transport | NMVOC             | -47.7% | -37.7% | -67.8% | LM | LM | UM |
| 5.4 Other_ground_transport | NOx               | -71.8% | -41.7% | -53.5% | UM | LM | UM |
| 5.4 Other_ground_transport | OC                | -80.8% | -64.6% | -68.2% | UM | UM | UM |
| 5.4 Other_ground_transport | PM <sub>10</sub>  | -86.0% | -73.3% | -41.0% | UM | UM | LM |
| 5.4 Other_ground_transport | PM <sub>2.5</sub> | -82.6% | -82.3% | -37.3% | UM | UM | LM |
| 5.4 Other_ground_transport | SO <sub>2</sub>   | -83.8% | -84.0% | -40.9% | UM | UM | LM |
| 6 Residential              | BC                | 30.2%  | 18.2%  | -31.0% | LM | LM | LM |
| 6 Residential              | CO                | 15.0%  | 4.9%   | -28.3% | LM | L  | LM |
| 6 Residential              | NH <sub>3</sub>   | -8.0%  | 3.9%   | 2.0%   | L  | L  | L  |
| 6 Residential              | NMVOC             | -7.4%  | -9.5%  | -21.5% | L  | L  | LM |
| 6 Residential              | NOx               | -17.0% | -18.3% | -24.5% | LM | LM | LM |
| 6 Residential              | OC                | -16.5% | -20.5% | -28.2% | LM | LM | LM |
| 6 Residential              | PM <sub>10</sub>  | -20.6% | -20.5% | 8.6%   | LM | LM | L  |
| 6 Residential              | PM <sub>2.5</sub> | -39.0% | -28.8% | -13.6% | LM | LM | L  |
| 6 Residential              | SO <sub>2</sub>   | -41.6% | -40.3% | -6.7%  | LM | LM | L  |
| 7 Waste                    | BC                | 78.1%  | 54.9%  | -74.2% | UM | UM | UM |
| 7 Waste                    | CO                | 9.2%   | 7.4%   | -96.1% | L  | L  | UM |
| 7 Waste                    | NH <sub>3</sub>   | -34.5% | -13.3% | -30.9% | LM | L  | LM |
| 7 Waste                    | NMVOC             | -60.8% | -48.6% | 59.2%  | UM | LM | UM |
| 7 Waste                    | NOx               | -50.5% | -57.3% | -54.8% | UM | UM | UM |

|                                |                   |        |        |        |    |    |    |
|--------------------------------|-------------------|--------|--------|--------|----|----|----|
| 7_Waste                        | OC                | -70.5% | -58.4% | -82.6% | UM | UM | UM |
| 7_Waste                        | PM <sub>10</sub>  | -81.2% | -74.0% | -49.6% | UM | UM | LM |
| 7_Waste                        | PM <sub>2.5</sub> | -89.9% | -82.7% | -59.3% | UM | UM | UM |
| 7_Waste                        | SO <sub>2</sub>   | -95.7% | -95.8% | 0.5%   | UM | UM | L  |
| 8.1_Agricultural_waste_burning | BC                | 7.5%   | 6.7%   | -2.6%  | L  | L  | L  |
| 8.1_Agricultural_waste_burning | CO                | 6.6%   | 6.1%   | -0.1%  | L  | L  | L  |
| 8.1_Agricultural_waste_burning | NH <sub>3</sub>   | 7.0%   | 5.8%   | -5.2%  | L  | L  | L  |
| 8.1_Agricultural_waste_burning | NM VOC            | 5.6%   | 5.4%   | -3.9%  | L  | L  | L  |
| 8.1_Agricultural_waste_burning | NO <sub>x</sub>   | 5.6%   | 5.1%   | -0.5%  | L  | L  | L  |
| 8.1_Agricultural_waste_burning | OC                | 5.4%   | 4.9%   | 0.4%   | L  | L  | L  |
| 8.1_Agricultural_waste_burning | PM <sub>10</sub>  | 3.8%   | 4.0%   | -1.2%  | L  | L  | L  |
| 8.1_Agricultural_waste_burning | PM <sub>2.5</sub> | 1.0%   | 2.7%   | -0.5%  | L  | L  | L  |
| 8.1_Agricultural_waste_burning | SO <sub>2</sub>   | -1.1%  | 0.3%   | -1.6%  | L  | L  | L  |
| 8.2_Agriculture_livestock      | NH <sub>3</sub>   | 11.5%  | 10.7%  | -31.7% | L  | L  | LM |
| 8.2_Agriculture_livestock      | NM VOC            | -14.7% | -9.4%  | -11.4% | L  | L  | L  |
| 8.2_Agriculture_livestock      | NO <sub>x</sub>   | -25.2% | -20.9% | 10.5%  | LM | LM | L  |
| 8.2_Agriculture_livestock      | PM <sub>10</sub>  | -33.8% | -26.7% | 22.2%  | LM | LM | LM |
| 8.2_Agriculture_livestock      | PM <sub>2.5</sub> | -34.8% | -27.8% | 23.8%  | LM | LM | LM |
| 8.3_Agriculture_crops          | NH <sub>3</sub>   | 13.1%  | 11.7%  | 17.3%  | L  | L  | LM |
| 8.3_Agriculture_crops          | NM VOC            | 16.6%  | 8.7%   | -2.6%  | LM | L  | L  |
| 8.3_Agriculture_crops          | NO <sub>x</sub>   | 6.9%   | 6.8%   | 11.2%  | L  | L  | L  |
| 8.3_Agriculture_crops          | PM <sub>10</sub>  | -82.1% | -77.8% | -66.5% | UM | UM | UM |
| 8.3_Agriculture_crops          | PM <sub>2.5</sub> | -92.6% | -91.6% | -43.5% | UM | UM | LM |

## References

Klimont, Z., Kupiainen, K., Heyes, C., Purohit, P., Cofala, J., Rafaj, P., Borken-Kleefeld, J., and Schöpp, W.: Global anthropogenic emissions of particulate matter including black carbon, *Atmos. Chem. Phys.*, 17, 8681-8723, 10.5194/acp-17-8681-2017, 2017.

Kurokawa, J. and Ohara, T.: Long-term historical trends in air pollutant emissions in Asia: Regional Emission inventory in ASia (REAS) version 3, *Atmospheric Chemistry and Physics*, 20, 12761-12793, <https://doi.org/10.5194/acp-20-12761-2020>, 2020.

O'Rourke, P. R., Smith, S. J., Mott, A., Ahsan, H., McDuffie, E. E., Crippa, M., Klimont, S., McDonald, B., Z., Wang, Nicholson, M. B., Feng, L., and Hoesly, R. M.: Community Emissions Data System (Version 04-21-2021), Zenodo. <https://doi.org/10.5281/zenodo.4737769> 2021.

Oreggioni, G. D., Mahiques, O., Monforti-Ferrario, F., Schaaf, E., Muntean, M., Guizzardi, D., Vignati, E., and Crippa, M.: The impacts of technological changes and regulatory frameworks on global air pollutant emissions from the energy industry and road transport, *Energy Policy*, 168, 113021, <https://doi.org/10.1016/j.enpol.2022.113021>, 2022.
